# Supplementary material
Source: ML conference proceedings conference paper supplement (https://openreview.net/forum?id=n2FDcSYcGkR)
Supplement: supplementary_material [file attachment]

## Sheet: Summary
Section	Chart	Question	Participant #	Taxonomy	Actual Answer	Participant Answer	directional % error	Absolute % Error
1	Traditional Bar	1	A1	Retrieve Value (Small)	44074	50000	13.4456	13.4456
1	Traditional Bar	1	A3	Retrieve Value (Small)	44074	50000	13.4456	13.4456
1	Traditional Bar	1	A5	Retrieve Value (Small)	44074	40000	-9.24354	9.24354
1	Traditional Bar	1	A6	Retrieve Value (Small)	44074	25000	-43.2772	43.2772
1	Traditional Bar	1	A7	Retrieve Value (Small)	44074	50000	13.4456	13.4456
1	Traditional Bar	1	A8	Retrieve Value (Small)	44074	50000	13.4456	13.4456
1	Traditional Bar	1	A9	Retrieve Value (Small)	44074	50000	13.4456	13.4456
1	Traditional Bar	1	A10	Retrieve Value (Small)	44074	100000	126.891	126.891
1	Traditional Bar	1	A11	Retrieve Value (Small)	44074	34000	-22.857	22.857
1	Traditional Bar	1	A12	Retrieve Value (Small)	44074	50000	13.4456	13.4456
1	Traditional Bar	2	A1	DMD (Two Small Values)	68847	80000	16.1997	16.1997
1	Traditional Bar	2	A2	DMD (Two Small Values)	68847	65000	-5.58775	5.58775
1	Traditional Bar	2	A3	DMD (Two Small Values)	68847	50000	-27.3752	27.3752
1	Traditional Bar	2	A4	DMD (Two Small Values)	68847	15000	-78.2126	78.2126
1	Traditional Bar	2	A5	DMD (Two Small Values)	68847	30000	-56.4251	56.4251
1	Traditional Bar	2	A6	DMD (Two Small Values)	68847	35000	-49.1626	49.1626
1	Traditional Bar	2	A7	DMD (Two Small Values)	68847	50000	-27.3752	27.3752
1	Traditional Bar	2	A8	DMD (Two Small Values)	68847	65000	-5.58775	5.58775
1	Traditional Bar	2	A9	DMD (Two Small Values)	68847	60000	-12.8502	12.8502
1	Traditional Bar	2	A10	DMD (Two Small Values)	68847	150000	117.874	117.874
1	Traditional Bar	2	A11	DMD (Two Small Values)	68847	1000000	1352.5	1352.5
1	Traditional Bar	3	A1	DMD (Small & Large Values)	7.65	7	-8.49673	8.49673
1	Traditional Bar	3	A2	DMD (Small & Large Values)	7.65	7	-8.49673	8.49673
1	Traditional Bar	3	A3	DMD (Small & Large Values)	7.65	6	-21.5686	21.5686
1	Traditional Bar	3	A4	DMD (Small & Large Values)	7.65	10	30.719	30.719
1	Traditional Bar	3	A5	DMD (Small & Large Values)	7.65	9.5	24.183	24.183
1	Traditional Bar	3	A6	DMD (Small & Large Values)	7.65	7	-8.49673	8.49673
1	Traditional Bar	3	A7	DMD (Small & Large Values)	7.65	7	-8.49673	8.49673
1	Traditional Bar	3	A8	DMD (Small & Large Values)	7.65	8	4.57516	4.57516
1	Traditional Bar	3	A9	DMD (Small & Large Values)	7.65	6	-21.5686	21.5686
1	Traditional Bar	3	A10	DMD (Small & Large Values)	7.65	10	30.719	30.719
1	Traditional Bar	4	A1	Find Extremum	5101908	5050000	-1.01742	1.01742
1	Traditional Bar	4	A2	Find Extremum	5101908	5000000	-1.99745	1.99745
1	Traditional Bar	4	A3	Find Extremum	5101908	5100000	-0.0373978	0.0373978
1	Traditional Bar	4	A4	Find Extremum	5101908	45000000	782.023	782.023
1	Traditional Bar	4	A5	Find Extremum	5101908	5000000	-1.99745	1.99745
1	Traditional Bar	4	A6	Find Extremum	5101908	5300000	3.8827	3.8827
1	Traditional Bar	4	A7	Find Extremum	5101908	5010000	-1.80144	1.80144
1	Traditional Bar	4	A8	Find Extremum	5101908	5100000	-0.0373978	0.0373978
1	Traditional Bar	4	A9	Find Extremum	5101908	4500000	-11.7977	11.7977
1	Traditional Bar	4	A10	Find Extremum	5101908	5150000	0.942628	0.942628
1	Traditional Bar	4	A12	Find Extremum	5101908	5000000	-1.99745	1.99745
1	Traditional Bar	5	A1	Filter	6	5	-16.6667	16.6667
1	Traditional Bar	5	A2	Filter	6	6	0	0
1	Traditional Bar	5	A3	Filter	6	6	0	0
1	Traditional Bar	5	A4	Filter	6	4	-33.3333	33.3333
1	Traditional Bar	5	A5	Filter	6	5	-16.6667	16.6667
1	Traditional Bar	5	A6	Filter	6	5	-16.6667	16.6667
1	Traditional Bar	5	A7	Filter	6	7	16.6667	16.6667
1	Traditional Bar	5	A8	Filter	6	6	0	0
1	Traditional Bar	5	A9	Filter	6	5	-16.6667	16.6667
1	Traditional Bar	5	A10	Filter	6	8	33.3333	33.3333
1	Traditional Bar	5	A11	Filter	6	6	0	0
1	Traditional Bar	5	A12	Filter	6	8	33.3333	33.3333
1	Slanted	1	B1	Retrieve Value (Small)	44074	50000	13.4456	13.4456
1	Slanted	1	B2	Retrieve Value (Small)	44074	50000	13.4456	13.4456
1	Slanted	1	B3	Retrieve Value (Small)	44074	50000	13.4456	13.4456
1	Slanted	1	B4	Retrieve Value (Small)	44074	50000	13.4456	13.4456
1	Slanted	1	B5	Retrieve Value (Small)	44074	100000	126.891	126.891
1	Slanted	1	B6	Retrieve Value (Small)	44074	50000	13.4456	13.4456
1	Slanted	1	B7	Retrieve Value (Small)	44074	100000	126.891	126.891
1	Slanted	1	B8	Retrieve Value (Small)	44074	100000	126.891	126.891
1	Slanted	1	B9	Retrieve Value (Small)	44074	4000	-90.9244	90.9244
1	Slanted	1	B10	Retrieve Value (Small)	44074	100000	126.891	126.891
1	Slanted	1	B11	Retrieve Value (Small)	44074	75000	70.1684	70.1684
1	Slanted	1	B12	Retrieve Value (Small)	44074	10000	-77.3109	77.3109
1	Slanted	2	B1	DMD (Two Small Values)	68847	60000	-12.8502	12.8502
1	Slanted	2	B2	DMD (Two Small Values)	68847	75000	8.93721	8.93721
1	Slanted	2	B3	DMD (Two Small Values)	68847	60000	-12.8502	12.8502
1	Slanted	2	B4	DMD (Two Small Values)	68847	100000	45.2496	45.2496
1	Slanted	2	B5	DMD (Two Small Values)	68847	150000	117.874	117.874
1	Slanted	2	B6	DMD (Two Small Values)	68847	100000	45.2496	45.2496
1	Slanted	2	B8	DMD (Two Small Values)	68847	100000	45.2496	45.2496
1	Slanted	2	B9	DMD (Two Small Values)	68847	5000	-92.7375	92.7375
1	Slanted	2	B10	DMD (Two Small Values)	68847	35000	-49.1626	49.1626
1	Slanted	2	B11	DMD (Two Small Values)	68847	50000	-27.3752	27.3752
1	Slanted	2	B12	DMD (Two Small Values)	68847	2500	-96.3688	96.3688
1	Slanted	3	B1	DMD (Small & Large Values)	7.65	7.2	-5.88235	5.88235
1	Slanted	3	B2	DMD (Small & Large Values)	7.65	17	122.222	122.222
1	Slanted	3	B3	DMD (Small & Large Values)	7.65	8	4.57516	4.57516
1	Slanted	3	B4	DMD (Small & Large Values)	7.65	7.5	-1.96078	1.96078
1	Slanted	3	B5	DMD (Small & Large Values)	7.65	5	-34.6405	34.6405
1	Slanted	3	B7	DMD (Small & Large Values)	7.65	7	-8.49673	8.49673
1	Slanted	3	B8	DMD (Small & Large Values)	7.65	9	17.6471	17.6471
1	Slanted	3	B9	DMD (Small & Large Values)	7.65	6	-21.5686	21.5686
1	Slanted	3	B10	DMD (Small & Large Values)	7.65	6	-21.5686	21.5686
1	Slanted	3	B11	DMD (Small & Large Values)	7.65	8	4.57516	4.57516
1	Slanted	3	B12	DMD (Small & Large Values)	7.65	17	122.222	122.222
1	Slanted	4	B1	Find Extremum	5101908	490000	-90.3957	90.3957
1	Slanted	4	B2	Find Extremum	5101908	250000	-95.0999	95.0999
1	Slanted	4	B3	Find Extremum	5101908	5025000	-1.50744	1.50744
1	Slanted	4	B4	Find Extremum	5101908	4500000	-11.7977	11.7977
1	Slanted	4	B5	Find Extremum	5101908	4910000	-3.76149	3.76149
1	Slanted	4	B6	Find Extremum	5101908	4000000	-21.598	21.598
1	Slanted	4	B7	Find Extremum	5101908	5121000	0.374213	0.374213
1	Slanted	4	B8	Find Extremum	5101908	5150000	0.942628	0.942628
1	Slanted	4	B9	Find Extremum	5101908	5002000	-1.95825	1.95825
1	Slanted	4	B10	Find Extremum	5101908	6000000	17.6031	17.6031
1	Slanted	4	B11	Find Extremum	5101908	463500	-90.9152	90.9152
1	Slanted	4	B12	Find Extremum	5101908	5007500	-1.85044	1.85044
1	Slanted	5	B1	Filter	6	6	0	0
1	Slanted	5	B2	Filter	6	1	-83.3333	83.3333
1	Slanted	5	B3	Filter	6	6	0	0
1	Slanted	5	B4	Filter	6	7	16.6667	16.6667
1	Slanted	5	B5	Filter	6	5	-16.6667	16.6667
1	Slanted	5	B6	Filter	6	6	0	0
1	Slanted	5	B7	Filter	6	1	-83.3333	83.3333
1	Slanted	5	B8	Filter	6	8	33.3333	33.3333
1	Slanted	5	B9	Filter	6	5	-16.6667	16.6667
1	Slanted	5	B10	Filter	6	5	-16.6667	16.6667
1	Slanted	5	B11	Filter	6	5	-16.6667	16.6667
1	Slanted	5	B12	Filter	6	8	33.3333	33.3333
2	Traditional Bar	1	B1	Retrieve Value (Small)	34451	27000	-21.6278	21.6278
2	Traditional Bar	1	B2	Retrieve Value (Small)	34451	35000	1.59357	1.59357
2	Traditional Bar	1	B3	Retrieve Value (Small)	34451	35000	1.59357	1.59357
2	Traditional Bar	1	B4	Retrieve Value (Small)	34451	30000	-12.9198	12.9198
2	Traditional Bar	1	B5	Retrieve Value (Small)	34451	40000	16.1069	16.1069
2	Traditional Bar	1	B6	Retrieve Value (Small)	34451	30000	-12.9198	12.9198
2	Traditional Bar	1	B7	Retrieve Value (Small)	34451	37000	7.39891	7.39891
2	Traditional Bar	1	B8	Retrieve Value (Small)	34451	375000	988.503	988.503
2	Traditional Bar	1	B9	Retrieve Value (Small)	34451	32000	-7.11445	7.11445
2	Traditional Bar	1	B10	Retrieve Value (Small)	34451	30000	-12.9198	12.9198
2	Traditional Bar	1	B11	Retrieve Value (Small)	34451	30000	-12.9198	12.9198
2	Traditional Bar	1	B12	Retrieve Value (Small)	34451	37500	8.85025	8.85025
2	Traditional Bar	2	B1	DMD (Two Small Values)	21305	24000	12.6496	12.6496
2	Traditional Bar	2	B2	DMD (Two Small Values)	21305	27500	29.0777	29.0777
2	Traditional Bar	2	B3	DMD (Two Small Values)	21305	20000	-6.12532	6.12532
2	Traditional Bar	2	B4	DMD (Two Small Values)	21305	30000	40.812	40.812
2	Traditional Bar	2	B5	DMD (Two Small Values)	21305	10000	-53.0627	53.0627
2	Traditional Bar	2	B6	DMD (Two Small Values)	21305	30000	40.812	40.812
2	Traditional Bar	2	B7	DMD (Two Small Values)	21305	33500	57.2401	57.2401
2	Traditional Bar	2	B8	DMD (Two Small Values)	21305	250000	1073.43	1073.43
2	Traditional Bar	2	B9	DMD (Two Small Values)	21305	17000	-20.2065	20.2065
2	Traditional Bar	2	B10	DMD (Two Small Values)	21305	40000	87.7494	87.7494
2	Traditional Bar	2	B11	DMD (Two Small Values)	21305	20000	-6.12532	6.12532
2	Traditional Bar	2	B12	DMD (Two Small Values)	21305	25000	17.3433	17.3433
2	Traditional Bar	3	B1	DMD (Small & Large Values)	9.36	9	-3.84615	3.84615
2	Traditional Bar	3	B2	DMD (Small & Large Values)	9.36	21	124.359	124.359
2	Traditional Bar	3	B3	DMD (Small & Large Values)	9.36	9	-3.84615	3.84615
2	Traditional Bar	3	B4	DMD (Small & Large Values)	9.36	10	6.83761	6.83761
2	Traditional Bar	3	B5	DMD (Small & Large Values)	9.36	8.5	-9.18803	9.18803
2	Traditional Bar	3	B7	DMD (Small & Large Values)	9.36	9.5	1.49573	1.49573
2	Traditional Bar	3	B8	DMD (Small & Large Values)	9.36	5	-46.5812	46.5812
2	Traditional Bar	3	B9	DMD (Small & Large Values)	9.36	5	-46.5812	46.5812
2	Traditional Bar	3	B10	DMD (Small & Large Values)	9.36	8	-14.5299	14.5299
2	Traditional Bar	3	B11	DMD (Small & Large Values)	9.36	8	-14.5299	14.5299
2	Traditional Bar	3	B12	DMD (Small & Large Values)	9.36	2.1	-77.5641	77.5641
2	Traditional Bar	4	B1	Find Extremum	563755	545000	-3.3268	3.3268
2	Traditional Bar	4	B2	Find Extremum	563755	550000	-2.43989	2.43989
2	Traditional Bar	4	B3	Find Extremum	563755	555000	-1.55298	1.55298
2	Traditional Bar	4	B4	Find Extremum	563755	260000	-53.8807	53.8807
2	Traditional Bar	4	B5	Find Extremum	563755	57000	-89.8892	89.8892
2	Traditional Bar	4	B6	Find Extremum	563755	500000	-11.309	11.309
2	Traditional Bar	4	B7	Find Extremum	563755	565000	0.220841	0.220841
2	Traditional Bar	4	B8	Find Extremum	563755	545000	-3.3268	3.3268
2	Traditional Bar	4	B9	Find Extremum	563755	550000	-2.43989	2.43989
2	Traditional Bar	4	B10	Find Extremum	563755	525000	-6.87444	6.87444
2	Traditional Bar	4	B11	Find Extremum	563755	578000	2.52681	2.52681
2	Traditional Bar	4	B12	Find Extremum	563755	570000	1.10775	1.10775
2	Traditional Bar	5	B1	Filter	11	10	-9.09091	9.09091
2	Traditional Bar	5	B2	Filter	11	11	0	0
2	Traditional Bar	5	B3	Filter	11	11	0	0
2	Traditional Bar	5	B4	Filter	11	10	-9.09091	9.09091
2	Traditional Bar	5	B5	Filter	11	11	0	0
2	Traditional Bar	5	B6	Filter	11	10	-9.09091	9.09091
2	Traditional Bar	5	B7	Filter	11	11	0	0
2	Traditional Bar	5	B8	Filter	11	11	0	0
2	Traditional Bar	5	B9	Filter	11	10	-9.09091	9.09091
2	Traditional Bar	5	B10	Filter	11	10	-9.09091	9.09091
2	Traditional Bar	5	B11	Filter	11	9	-18.1818	18.1818
2	Traditional Bar	5	B12	Filter	11	11	0	0
2	Slanted	1	A1	Retrieve Value (Small)	34451	350000	915.936	915.936
2	Slanted	1	A2	Retrieve Value (Small)	34451	37000	7.39891	7.39891
2	Slanted	1	A3	Retrieve Value (Small)	34451	35000	1.59357	1.59357
2	Slanted	1	A4	Retrieve Value (Small)	34451	35000	1.59357	1.59357
2	Slanted	1	A5	Retrieve Value (Small)	34451	37500	8.85025	8.85025
2	Slanted	1	A6	Retrieve Value (Small)	34451	35000	1.59357	1.59357
2	Slanted	1	A7	Retrieve Value (Small)	34451	35000	1.59357	1.59357
2	Slanted	1	A8	Retrieve Value (Small)	34451	36000	4.49624	4.49624
2	Slanted	1	A9	Retrieve Value (Small)	34451	38000	10.3016	10.3016
2	Slanted	1	A10	Retrieve Value (Small)	34451	35000	1.59357	1.59357
2	Slanted	1	A11	Retrieve Value (Small)	34451	37000	7.39891	7.39891
2	Slanted	1	A12	Retrieve Value (Small)	34451	30000	-12.9198	12.9198
2	Slanted	2	A1	DMD (Two Small Values)	21305	20000	-6.12532	6.12532
2	Slanted	2	A2	DMD (Two Small Values)	21305	20000	-6.12532	6.12532
2	Slanted	2	A3	DMD (Two Small Values)	21305	45000	111.218	111.218
2	Slanted	2	A4	DMD (Two Small Values)	21305	15000	-29.594	29.594
2	Slanted	2	A5	DMD (Two Small Values)	21305	24000	12.6496	12.6496
2	Slanted	2	A6	DMD (Two Small Values)	21305	20000	-6.12532	6.12532
2	Slanted	2	A7	DMD (Two Small Values)	21305	20000	-6.12532	6.12532
2	Slanted	2	A8	DMD (Two Small Values)	21305	21000	-1.43159	1.43159
2	Slanted	2	A9	DMD (Two Small Values)	21305	25000	17.3433	17.3433
2	Slanted	2	A10	DMD (Two Small Values)	21305	15000	-29.594	29.594
2	Slanted	2	A11	DMD (Two Small Values)	21305	20000	-6.12532	6.12532
2	Slanted	2	A12	DMD (Two Small Values)	21305	25000	17.3433	17.3433
2	Slanted	3	A2	DMD (Small & Large Values)	9.36	10	6.83761	6.83761
2	Slanted	3	A3	DMD (Small & Large Values)	9.36	9	-3.84615	3.84615
2	Slanted	3	A4	DMD (Small & Large Values)	9.36	10	6.83761	6.83761
2	Slanted	3	A5	DMD (Small & Large Values)	9.36	10	6.83761	6.83761
2	Slanted	3	A6	DMD (Small & Large Values)	9.36	9	-3.84615	3.84615
2	Slanted	3	A7	DMD (Small & Large Values)	9.36	9.5	1.49573	1.49573
2	Slanted	3	A8	DMD (Small & Large Values)	9.36	9.5	1.49573	1.49573
2	Slanted	3	A9	DMD (Small & Large Values)	9.36	9	-3.84615	3.84615
2	Slanted	3	A10	DMD (Small & Large Values)	9.36	8	-14.5299	14.5299
2	Slanted	4	A1	Find Extremum	563755	530000	-5.98753	5.98753
2	Slanted	4	A2	Find Extremum	563755	570000	1.10775	1.10775
2	Slanted	4	A3	Find Extremum	563755	560000	-0.666069	0.666069
2	Slanted	4	A4	Find Extremum	563755	570000	1.10775	1.10775
2	Slanted	4	A5	Find Extremum	563755	5870000	941.232	941.232
2	Slanted	4	A6	Find Extremum	563755	500000	-11.309	11.309
2	Slanted	4	A7	Find Extremum	563755	60000	-89.3571	89.3571
2	Slanted	4	A8	Find Extremum	563755	560000	-0.666069	0.666069
2	Slanted	4	A9	Find Extremum	563755	350000	-37.9163	37.9163
2	Slanted	4	A10	Find Extremum	563755	500000	-11.309	11.309
2	Slanted	4	A11	Find Extremum	563755	500000	-11.309	11.309
2	Slanted	4	A12	Find Extremum	563755	550000	-2.43989	2.43989
2	Slanted	5	A1	Filter	11	10	-9.09091	9.09091
2	Slanted	5	A2	Filter	11	11	0	0
2	Slanted	5	A3	Filter	11	6	-45.4545	45.4545
2	Slanted	5	A4	Filter	11	9	-18.1818	18.1818
2	Slanted	5	A5	Filter	11	11	0	0
2	Slanted	5	A6	Filter	11	9	-18.1818	18.1818
2	Slanted	5	A7	Filter	11	11	0	0
2	Slanted	5	A8	Filter	11	11	0	0
2	Slanted	5	A9	Filter	11	11	0	0
2	Slanted	5	A10	Filter	11	12	9.09091	9.09091
2	Slanted	5	A11	Filter	11	11	0	0
2	Slanted	5	A12	Filter	11	11	0	0
3	Scale-Stack	1	A1	Retrieve Value (Small)	37664	750000	1891.29	1891.29
3	Scale-Stack	1	A2	Retrieve Value (Small)	37664	60000	59.3033	59.3033
3	Scale-Stack	1	A3	Retrieve Value (Small)	37664	75000	99.1291	99.1291
3	Scale-Stack	1	A4	Retrieve Value (Small)	37664	35000	-7.07307	7.07307
3	Scale-Stack	1	A5	Retrieve Value (Small)	37664	75000	99.1291	99.1291
3	Scale-Stack	1	A6	Retrieve Value (Small)	37664	35000	-7.07307	7.07307
3	Scale-Stack	1	A7	Retrieve Value (Small)	37664	35000	-7.07307	7.07307
3	Scale-Stack	1	A8	Retrieve Value (Small)	37664	38000	0.892099	0.892099
3	Scale-Stack	1	A9	Retrieve Value (Small)	37664	37500	-0.435429	0.435429
3	Scale-Stack	1	A10	Retrieve Value (Small)	37664	40000	6.20221	6.20221
3	Scale-Stack	1	A11	Retrieve Value (Small)	37664	38000	0.892099	0.892099
3	Scale-Stack	1	A12	Retrieve Value (Small)	37664	75000	99.1291	99.1291
3	Scale-Stack	2	A1	DMD (Two Small Values)	97745	500000	411.535	411.535
3	Scale-Stack	2	A2	DMD (Two Small Values)	97745	110000	12.5377	12.5377
3	Scale-Stack	2	A3	DMD (Two Small Values)	97745	100000	2.30702	2.30702
3	Scale-Stack	2	A4	DMD (Two Small Values)	97745	50000	-48.8465	48.8465
3	Scale-Stack	2	A5	DMD (Two Small Values)	97745	45000	-53.9618	53.9618
3	Scale-Stack	2	A6	DMD (Two Small Values)	97745	80000	-18.1544	18.1544
3	Scale-Stack	2	A7	DMD (Two Small Values)	97745	105000	7.42237	7.42237
3	Scale-Stack	2	A8	DMD (Two Small Values)	97745	205000	109.729	109.729
3	Scale-Stack	2	A9	DMD (Two Small Values)	97745	110000	12.5377	12.5377
3	Scale-Stack	2	A10	DMD (Two Small Values)	97745	265000	171.114	171.114
3	Scale-Stack	2	A11	DMD (Two Small Values)	97745	90000	-7.92368	7.92368
3	Scale-Stack	2	A12	DMD (Two Small Values)	97745	210000	114.845	114.845
3	Scale-Stack	3	A2	DMD (Small & Large Values)	51.4	40	-22.179	22.179
3	Scale-Stack	3	A3	DMD (Small & Large Values)	51.4	4.5	-91.2451	91.2451
3	Scale-Stack	3	A4	DMD (Small & Large Values)	51.4	50	-2.72374	2.72374
3	Scale-Stack	3	A5	DMD (Small & Large Values)	51.4	8	-84.4358	84.4358
3	Scale-Stack	3	A6	DMD (Small & Large Values)	51.4	5	-90.2724	90.2724
3	Scale-Stack	3	A7	DMD (Small & Large Values)	51.4	5.5	-89.2996	89.2996
3	Scale-Stack	3	A8	DMD (Small & Large Values)	51.4	37	-28.0156	28.0156
3	Scale-Stack	3	A9	DMD (Small & Large Values)	51.4	300	483.658	483.658
3	Scale-Stack	3	A10	DMD (Small & Large Values)	51.4	12	-76.6537	76.6537
3	Scale-Stack	3	A11	DMD (Small & Large Values)	51.4	4	-92.2179	92.2179
3	Scale-Stack	3	A12	DMD (Small & Large Values)	51.4	40	-22.179	22.179
3	Scale-Stack	4	A1	Find Extremum	3390877	5960000	75.7657	75.7657
3	Scale-Stack	4	A2	Find Extremum	3390877	2800000	-17.4255	17.4255
3	Scale-Stack	4	A3	Find Extremum	3390877	3500000	3.21814	3.21814
3	Scale-Stack	4	A4	Find Extremum	3390877	2980000	-12.1171	12.1171
3	Scale-Stack	4	A6	Find Extremum	3390877	2980000	-12.1171	12.1171
3	Scale-Stack	4	A7	Find Extremum	3390877	3480000	2.62832	2.62832
3	Scale-Stack	4	A8	Find Extremum	3390877	3000000	-11.5273	11.5273
3	Scale-Stack	4	A9	Find Extremum	3390877	30000000	784.727	784.727
3	Scale-Stack	4	A10	Find Extremum	3390877	380000	-88.7935	88.7935
3	Scale-Stack	4	A11	Find Extremum	3390877	2800000	-17.4255	17.4255
3	Scale-Stack	4	A12	Find Extremum	3390877	2982000	-12.0581	12.0581
3	Stepped	1	B1	Retrieve Value (Small)	37664	40000	6.20221	6.20221
3	Stepped	1	B2	Retrieve Value (Small)	37664	40000	6.20221	6.20221
3	Stepped	1	B3	Retrieve Value (Small)	37664	40000	6.20221	6.20221
3	Stepped	1	B4	Retrieve Value (Small)	37664	40000	6.20221	6.20221
3	Stepped	1	B5	Retrieve Value (Small)	37664	50000	32.7528	32.7528
3	Stepped	1	B6	Retrieve Value (Small)	37664	400000	962.022	962.022
3	Stepped	1	B7	Retrieve Value (Small)	37664	400000	962.022	962.022
3	Stepped	1	B8	Retrieve Value (Small)	37664	45000	19.4775	19.4775
3	Stepped	1	B9	Retrieve Value (Small)	37664	40000	6.20221	6.20221
3	Stepped	1	B10	Retrieve Value (Small)	37664	35000	-7.07307	7.07307
3	Stepped	1	B11	Retrieve Value (Small)	37664	40000	6.20221	6.20221
3	Stepped	1	B12	Retrieve Value (Small)	37664	5000	-86.7247	86.7247
3	Stepped	2	B1	DMD (Two Small Values)	97745	90000	-7.92368	7.92368
3	Stepped	2	B2	DMD (Two Small Values)	97745	90000	-7.92368	7.92368
3	Stepped	2	B3	DMD (Two Small Values)	97745	100000	2.30702	2.30702
3	Stepped	2	B4	DMD (Two Small Values)	97745	100000	2.30702	2.30702
3	Stepped	2	B5	DMD (Two Small Values)	97745	100000	2.30702	2.30702
3	Stepped	2	B6	DMD (Two Small Values)	97745	100000	2.30702	2.30702
3	Stepped	2	B7	DMD (Two Small Values)	97745	105000	7.42237	7.42237
3	Stepped	2	B8	DMD (Two Small Values)	97745	100000	2.30702	2.30702
3	Stepped	2	B9	DMD (Two Small Values)	97745	100000	2.30702	2.30702
3	Stepped	2	B10	DMD (Two Small Values)	97745	75000	-23.2697	23.2697
3	Stepped	2	B11	DMD (Two Small Values)	97745	100000	2.30702	2.30702
3	Stepped	2	B12	DMD (Two Small Values)	97745	1000	-98.9769	98.9769
3	Stepped	3	B1	DMD (Small & Large Values)	51.4	4.8	-90.6615	90.6615
3	Stepped	3	B2	DMD (Small & Large Values)	51.4	34	-33.8521	33.8521
3	Stepped	3	B3	DMD (Small & Large Values)	51.4	49	-4.66926	4.66926
3	Stepped	3	B4	DMD (Small & Large Values)	51.4	50	-2.72374	2.72374
3	Stepped	3	B5	DMD (Small & Large Values)	51.4	12	-76.6537	76.6537
3	Stepped	3	B6	DMD (Small & Large Values)	51.4	7	-86.3813	86.3813
3	Stepped	3	B7	DMD (Small & Large Values)	51.4	45.3	-11.8677	11.8677
3	Stepped	3	B8	DMD (Small & Large Values)	51.4	34	-33.8521	33.8521
3	Stepped	3	B9	DMD (Small & Large Values)	51.4	50	-2.72374	2.72374
3	Stepped	3	B10	DMD (Small & Large Values)	51.4	11	-78.5992	78.5992
3	Stepped	3	B11	DMD (Small & Large Values)	51.4	50	-2.72374	2.72374
3	Stepped	3	B12	DMD (Small & Large Values)	51.4	33	-35.7977	35.7977
3	Stepped	4	B1	Find Extremum	3390877	3380000	-0.320772	0.320772
3	Stepped	4	B2	Find Extremum	3390877	3390000	-0.0258635	0.0258635
3	Stepped	4	B3	Find Extremum	3390877	3395000	0.121591	0.121591
3	Stepped	4	B4	Find Extremum	3390877	3350000	-1.2055	1.2055
3	Stepped	4	B5	Find Extremum	3390877	3380000	-0.320772	0.320772
3	Stepped	4	B6	Find Extremum	3390877	3000000	-11.5273	11.5273
3	Stepped	4	B7	Find Extremum	3390877	3385000	-0.173318	0.173318
3	Stepped	4	B8	Find Extremum	3390877	3375000	-0.468227	0.468227
3	Stepped	4	B9	Find Extremum	3390877	3320000	-2.09023	2.09023
3	Stepped	4	B10	Find Extremum	3390877	3300000	-2.68004	2.68004
3	Stepped	4	B11	Find Extremum	3390877	3380000	-0.320772	0.320772
3	Stepped	4	B12	Find Extremum	3390877	3380000	-0.320772	0.320772
4	Scale-Stack	1	B1	Retrieve Value (Small)	152200	300000	97.1091	97.1091
4	Scale-Stack	1	B3	Retrieve Value (Small)	152200	150000	-1.44547	1.44547
4	Scale-Stack	1	B4	Retrieve Value (Small)	152200	550000	261.367	261.367
4	Scale-Stack	1	B5	Retrieve Value (Small)	152200	125000	-17.8712	17.8712
4	Scale-Stack	1	B6	Retrieve Value (Small)	152200	600000	294.218	294.218
4	Scale-Stack	1	B7	Retrieve Value (Small)	152200	162500	6.76741	6.76741
4	Scale-Stack	1	B8	Retrieve Value (Small)	152200	525000	244.941	244.941
4	Scale-Stack	1	B9	Retrieve Value (Small)	152200	200000	31.406	31.406
4	Scale-Stack	1	B10	Retrieve Value (Small)	152200	32000	-78.975	78.975
4	Scale-Stack	1	B11	Retrieve Value (Small)	152200	600000	294.218	294.218
4	Scale-Stack	1	B12	Retrieve Value (Small)	152200	125000	-17.8712	17.8712
4	Scale-Stack	2	B1	DMD (Two Small Values)	105300	290000	175.404	175.404
4	Scale-Stack	2	B2	DMD (Two Small Values)	105300	90000	-14.5299	14.5299
4	Scale-Stack	2	B3	DMD (Two Small Values)	105300	100000	-5.03324	5.03324
4	Scale-Stack	2	B4	DMD (Two Small Values)	105300	525000	398.575	398.575
4	Scale-Stack	2	B5	DMD (Two Small Values)	105300	62000	-41.1206	41.1206
4	Scale-Stack	2	B6	DMD (Two Small Values)	105300	250000	137.417	137.417
4	Scale-Stack	2	B7	DMD (Two Small Values)	105300	112500	6.83761	6.83761
4	Scale-Stack	2	B8	DMD (Two Small Values)	105300	100000	-5.03324	5.03324
4	Scale-Stack	2	B9	DMD (Two Small Values)	105300	100000	-5.03324	5.03324
4	Scale-Stack	2	B10	DMD (Two Small Values)	105300	300000	184.9	184.9
4	Scale-Stack	2	B11	DMD (Two Small Values)	105300	2500	-97.6258	97.6258
4	Scale-Stack	2	B12	DMD (Two Small Values)	105300	118000	12.0608	12.0608
4	Scale-Stack	3	B3	DMD (Small & Large Values)	23.4	23	-1.7094	1.7094
4	Scale-Stack	3	B4	DMD (Small & Large Values)	23.4	13	-44.4444	44.4444
4	Scale-Stack	3	B5	DMD (Small & Large Values)	23.4	2	-91.453	91.453
4	Scale-Stack	3	B7	DMD (Small & Large Values)	23.4	22.2	-5.12821	5.12821
4	Scale-Stack	3	B8	DMD (Small & Large Values)	23.4	30	28.2051	28.2051
4	Scale-Stack	3	B9	DMD (Small & Large Values)	23.4	25	6.83761	6.83761
4	Scale-Stack	3	B11	DMD (Small & Large Values)	23.4	12	-48.7179	48.7179
4	Scale-Stack	3	B12	DMD (Small & Large Values)	23.4	3	-87.1795	87.1795
4	Scale-Stack	4	B1	Find Extremum	9329800	8850000	-5.14266	5.14266
4	Scale-Stack	4	B2	Find Extremum	9329800	8750000	-6.2145	6.2145
4	Scale-Stack	4	B3	Find Extremum	9329800	8051250	-13.7039	13.7039
4	Scale-Stack	4	B4	Find Extremum	9329800	880000	-90.5679	90.5679
4	Scale-Stack	4	B5	Find Extremum	9329800	9982000	6.9905	6.9905
4	Scale-Stack	4	B6	Find Extremum	9329800	2500000	-73.2041	73.2041
4	Scale-Stack	4	B7	Find Extremum	9329800	9482500	1.63669	1.63669
4	Scale-Stack	4	B8	Find Extremum	9329800	8975000	-3.80287	3.80287
4	Scale-Stack	4	B9	Find Extremum	9329800	9400000	0.752428	0.752428
4	Scale-Stack	4	B10	Find Extremum	9329800	9900000	6.1116	6.1116
4	Scale-Stack	4	B11	Find Extremum	9329800	13960000	49.6281	49.6281
4	Scale-Stack	4	B12	Find Extremum	9329800	74820000	701.946	701.946
4	Stepped	1	A1	Retrieve Value (Small)	152200	130000	-14.5861	14.5861
4	Stepped	1	A2	Retrieve Value (Small)	152200	200000	31.406	31.406
4	Stepped	1	A3	Retrieve Value (Small)	152200	180000	18.2654	18.2654
4	Stepped	1	A4	Retrieve Value (Small)	152200	200000	31.406	31.406
4	Stepped	1	A5	Retrieve Value (Small)	152200	13000	-91.4586	91.4586
4	Stepped	1	A6	Retrieve Value (Small)	152200	150000	-1.44547	1.44547
4	Stepped	1	A7	Retrieve Value (Small)	152200	150000	-1.44547	1.44547
4	Stepped	1	A8	Retrieve Value (Small)	152200	150000	-1.44547	1.44547
4	Stepped	1	A9	Retrieve Value (Small)	152200	180000	18.2654	18.2654
4	Stepped	1	A10	Retrieve Value (Small)	152200	170000	11.6951	11.6951
4	Stepped	1	A11	Retrieve Value (Small)	152200	180000	18.2654	18.2654
4	Stepped	1	A12	Retrieve Value (Small)	152200	170000	11.6951	11.6951
4	Stepped	2	A1	DMD (Two Small Values)	105300	92500	-12.1557	12.1557
4	Stepped	2	A2	DMD (Two Small Values)	105300	150000	42.4501	42.4501
4	Stepped	2	A3	DMD (Two Small Values)	105300	125000	18.7085	18.7085
4	Stepped	2	A4	DMD (Two Small Values)	105300	100000	-5.03324	5.03324
4	Stepped	2	A5	DMD (Two Small Values)	105300	100000	-5.03324	5.03324
4	Stepped	2	A6	DMD (Two Small Values)	105300	150000	42.4501	42.4501
4	Stepped	2	A7	DMD (Two Small Values)	105300	125000	18.7085	18.7085
4	Stepped	2	A8	DMD (Two Small Values)	105300	120000	13.9601	13.9601
4	Stepped	2	A9	DMD (Two Small Values)	105300	160000	51.9468	51.9468
4	Stepped	2	A10	DMD (Two Small Values)	105300	150000	42.4501	42.4501
4	Stepped	2	A11	DMD (Two Small Values)	105300	140000	32.9535	32.9535
4	Stepped	2	A12	DMD (Two Small Values)	105300	125000	18.7085	18.7085
4	Stepped	3	A2	DMD (Small & Large Values)	23.4	23	-1.7094	1.7094
4	Stepped	3	A3	DMD (Small & Large Values)	23.4	23	-1.7094	1.7094
4	Stepped	3	A4	DMD (Small & Large Values)	23.4	25	6.83761	6.83761
4	Stepped	3	A5	DMD (Small & Large Values)	23.4	15	-35.8974	35.8974
4	Stepped	3	A6	DMD (Small & Large Values)	23.4	25	6.83761	6.83761
4	Stepped	3	A7	DMD (Small & Large Values)	23.4	25	6.83761	6.83761
4	Stepped	3	A8	DMD (Small & Large Values)	23.4	36	53.8462	53.8462
4	Stepped	3	A9	DMD (Small & Large Values)	23.4	31	32.4786	32.4786
4	Stepped	3	A10	DMD (Small & Large Values)	23.4	15	-35.8974	35.8974
4	Stepped	3	A11	DMD (Small & Large Values)	23.4	25	6.83761	6.83761
4	Stepped	3	A12	DMD (Small & Large Values)	23.4	25	6.83761	6.83761
4	Stepped	4	A1	Find Extremum	9329800	9347500	0.189715	0.189715
4	Stepped	4	A2	Find Extremum	9329800	9200000	-1.39124	1.39124
4	Stepped	4	A3	Find Extremum	9329800	9300000	-0.319407	0.319407
4	Stepped	4	A4	Find Extremum	9329800	9000000	-3.53491	3.53491
4	Stepped	4	A5	Find Extremum	9329800	9000000	-3.53491	3.53491
4	Stepped	4	A6	Find Extremum	9329800	9250000	-0.855324	0.855324
4	Stepped	4	A7	Find Extremum	9329800	9300000	-0.319407	0.319407
4	Stepped	4	A8	Find Extremum	9329800	9350000	0.216511	0.216511
4	Stepped	4	A9	Find Extremum	9329800	9200000	-1.39124	1.39124
4	Stepped	4	A10	Find Extremum	9329800	9000000	-3.53491	3.53491
4	Stepped	4	A11	Find Extremum	9329800	9100000	-2.46308	2.46308
4	Stepped	4	A12	Find Extremum	9329800	9275000	-0.587365	0.587365
5	Broken	1	A1	Retrieve Value (Small)	399969	400000	0.0077506	0.0077506
5	Broken	1	A2	Retrieve Value (Small)	399969	480000	20.0093	20.0093
5	Broken	1	A3	Retrieve Value (Small)	399969	420000	5.00814	5.00814
5	Broken	1	A4	Retrieve Value (Small)	399969	400000	0.0077506	0.0077506
5	Broken	1	A5	Retrieve Value (Small)	399969	400000	0.0077506	0.0077506
5	Broken	1	A6	Retrieve Value (Small)	399969	475000	18.7592	18.7592
5	Broken	1	A7	Retrieve Value (Small)	399969	400000	0.0077506	0.0077506
5	Broken	1	A8	Retrieve Value (Small)	399969	420000	5.00814	5.00814
5	Broken	1	A9	Retrieve Value (Small)	399969	410000	2.50794	2.50794
5	Broken	1	A10	Retrieve Value (Small)	399969	46000	-88.4991	88.4991
5	Broken	1	A11	Retrieve Value (Small)	399969	4200000	950.081	950.081
5	Broken	1	A12	Retrieve Value (Small)	399969	400000	0.0077506	0.0077506
5	Broken	2	A1	Retrieve Value (Large)	8336599	8300000	-0.439016	0.439016
5	Broken	2	A2	Retrieve Value (Large)	8336599	8400000	0.760514	0.760514
5	Broken	2	A3	Retrieve Value (Large)	8336599	8300000	-0.439016	0.439016
5	Broken	2	A4	Retrieve Value (Large)	8336599	8300000	-0.439016	0.439016
5	Broken	2	A5	Retrieve Value (Large)	8336599	8300000	-0.439016	0.439016
5	Broken	2	A6	Retrieve Value (Large)	8336599	8400000	0.760514	0.760514
5	Broken	2	A7	Retrieve Value (Large)	8336599	8300000	-0.439016	0.439016
5	Broken	2	A8	Retrieve Value (Large)	8336599	8300000	-0.439016	0.439016
5	Broken	2	A9	Retrieve Value (Large)	8336599	8300000	-0.439016	0.439016
5	Broken	2	A10	Retrieve Value (Large)	8336599	8350000	0.160749	0.160749
5	Broken	2	A11	Retrieve Value (Large)	8336599	8380000	0.520608	0.520608
5	Broken	2	A12	Retrieve Value (Large)	8336599	8400000	0.760514	0.760514
5	Broken	3	A1	DMD (Two Small Values)	709386	800000	12.7736	12.7736
5	Broken	3	A2	DMD (Two Small Values)	709386	800000	12.7736	12.7736
5	Broken	3	A3	DMD (Two Small Values)	709386	600000	-15.4198	15.4198
5	Broken	3	A4	DMD (Two Small Values)	709386	800000	12.7736	12.7736
5	Broken	3	A5	DMD (Two Small Values)	709386	160000	-77.4453	77.4453
5	Broken	3	A6	DMD (Two Small Values)	709386	450000	-36.5649	36.5649
5	Broken	3	A7	DMD (Two Small Values)	709386	700000	-1.32312	1.32312
5	Broken	3	A8	DMD (Two Small Values)	709386	750000	5.72523	5.72523
5	Broken	3	A9	DMD (Two Small Values)	709386	700000	-1.32312	1.32312
5	Broken	3	A10	DMD (Two Small Values)	709386	1700000	139.644	139.644
5	Broken	3	A11	DMD (Two Small Values)	709386	700000	-1.32312	1.32312
5	Broken	3	A12	DMD (Two Small Values)	709386	90000	-87.313	87.313
5	Broken	4	A2	DMD (Small & Large Values)	9.06	21	131.788	131.788
5	Broken	4	A3	DMD (Small & Large Values)	9.06	9	-0.662252	0.662252
5	Broken	4	A4	DMD (Small & Large Values)	9.06	10.5	15.894	15.894
5	Broken	4	A5	DMD (Small & Large Values)	9.06	8.3	-8.38852	8.38852
5	Broken	4	A6	DMD (Small & Large Values)	9.06	9	-0.662252	0.662252
5	Broken	4	A7	DMD (Small & Large Values)	9.06	9	-0.662252	0.662252
5	Broken	4	A8	DMD (Small & Large Values)	9.06	10	10.3753	10.3753
5	Broken	4	A9	DMD (Small & Large Values)	9.06	9	-0.662252	0.662252
5	Broken	4	A10	DMD (Small & Large Values)	9.06	7	-22.7373	22.7373
5	Broken	4	A11	DMD (Small & Large Values)	9.06	9	-0.662252	0.662252
5	Broken	4	A12	DMD (Small & Large Values)	9.06	10	10.3753	10.3753
5	Stepped	1	B1	Retrieve Value (Small)	399969	40000	-89.9992	89.9992
5	Stepped	1	B2	Retrieve Value (Small)	399969	400000	0.0077506	0.0077506
5	Stepped	1	B3	Retrieve Value (Small)	399969	400000	0.0077506	0.0077506
5	Stepped	1	B4	Retrieve Value (Small)	399969	470000	17.5091	17.5091
5	Stepped	1	B5	Retrieve Value (Small)	399969	480000	20.0093	20.0093
5	Stepped	1	B6	Retrieve Value (Small)	399969	300000	-24.9942	24.9942
5	Stepped	1	B7	Retrieve Value (Small)	399969	375000	-6.24273	6.24273
5	Stepped	1	B8	Retrieve Value (Small)	399969	400000	0.0077506	0.0077506
5	Stepped	1	B9	Retrieve Value (Small)	399969	460000	15.0089	15.0089
5	Stepped	1	B10	Retrieve Value (Small)	399969	480000	20.0093	20.0093
5	Stepped	1	B11	Retrieve Value (Small)	399969	400000	0.0077506	0.0077506
5	Stepped	1	B12	Retrieve Value (Small)	399969	350000	-12.4932	12.4932
5	Stepped	2	B1	Retrieve Value (Large)	8336599	8400000	0.760514	0.760514
5	Stepped	2	B2	Retrieve Value (Large)	8336599	800000	-90.4038	90.4038
5	Stepped	2	B3	Retrieve Value (Large)	8336599	8330000	-0.079157	0.079157
5	Stepped	2	B4	Retrieve Value (Large)	8336599	8000000	-4.03761	4.03761
5	Stepped	2	B5	Retrieve Value (Large)	8336599	8000000	-4.03761	4.03761
5	Stepped	2	B6	Retrieve Value (Large)	8336599	8500000	1.96004	1.96004
5	Stepped	2	B7	Retrieve Value (Large)	8336599	8325000	-0.139133	0.139133
5	Stepped	2	B8	Retrieve Value (Large)	8336599	8400000	0.760514	0.760514
5	Stepped	2	B9	Retrieve Value (Large)	8336599	8350000	0.160749	0.160749
5	Stepped	2	B10	Retrieve Value (Large)	8336599	8300000	-0.439016	0.439016
5	Stepped	2	B11	Retrieve Value (Large)	8336599	8350000	0.160749	0.160749
5	Stepped	2	B12	Retrieve Value (Large)	8336599	8300000	-0.439016	0.439016
5	Stepped	3	B1	DMD (Two Small Values)	709386	500000	-29.5165	29.5165
5	Stepped	3	B3	DMD (Two Small Values)	709386	500000	-29.5165	29.5165
5	Stepped	3	B4	DMD (Two Small Values)	709386	800000	12.7736	12.7736
5	Stepped	3	B5	DMD (Two Small Values)	709386	800000	12.7736	12.7736
5	Stepped	3	B6	DMD (Two Small Values)	709386	700000	-1.32312	1.32312
5	Stepped	3	B7	DMD (Two Small Values)	709386	700000	-1.32312	1.32312
5	Stepped	3	B8	DMD (Two Small Values)	709386	600000	-15.4198	15.4198
5	Stepped	3	B9	DMD (Two Small Values)	709386	700000	-1.32312	1.32312
5	Stepped	3	B10	DMD (Two Small Values)	709386	700000	-1.32312	1.32312
5	Stepped	3	B11	DMD (Two Small Values)	709386	700000	-1.32312	1.32312
5	Stepped	3	B12	DMD (Two Small Values)	709386	900000	26.8703	26.8703
5	Stepped	4	B1	DMD (Small & Large Values)	9.06	9.1	0.441501	0.441501
5	Stepped	4	B2	DMD (Small & Large Values)	9.06	10	10.3753	10.3753
5	Stepped	4	B4	DMD (Small & Large Values)	9.06	100	1003.75	1003.75
5	Stepped	4	B5	DMD (Small & Large Values)	9.06	8	-11.6998	11.6998
5	Stepped	4	B6	DMD (Small & Large Values)	9.06	12	32.4503	32.4503
5	Stepped	4	B7	DMD (Small & Large Values)	9.06	8.8	-2.86976	2.86976
5	Stepped	4	B8	DMD (Small & Large Values)	9.06	8	-11.6998	11.6998
5	Stepped	4	B9	DMD (Small & Large Values)	9.06	8.5	-6.18102	6.18102
5	Stepped	4	B10	DMD (Small & Large Values)	9.06	5	-44.8124	44.8124
5	Stepped	4	B11	DMD (Small & Large Values)	9.06	10	10.3753	10.3753
5	Stepped	4	B12	DMD (Small & Large Values)	9.06	15	65.5629	65.5629
6	Broken	1	B1	Retrieve Value (Small)	33736	27000	-19.9668	19.9668
6	Broken	1	B2	Retrieve Value (Small)	33736	35000	3.74674	3.74674
6	Broken	1	B3	Retrieve Value (Small)	33736	35000	3.74674	3.74674
6	Broken	1	B4	Retrieve Value (Small)	33736	40000	18.5677	18.5677
6	Broken	1	B5	Retrieve Value (Small)	33736	3100	-90.811	90.811
6	Broken	1	B6	Retrieve Value (Small)	33736	30000	-11.0742	11.0742
6	Broken	1	B7	Retrieve Value (Small)	33736	35000	3.74674	3.74674
6	Broken	1	B8	Retrieve Value (Small)	33736	35000	3.74674	3.74674
6	Broken	1	B9	Retrieve Value (Small)	33736	30000	-11.0742	11.0742
6	Broken	1	B10	Retrieve Value (Small)	33736	28000	-17.0026	17.0026
6	Broken	1	B11	Retrieve Value (Small)	33736	32000	-5.14584	5.14584
6	Broken	1	B12	Retrieve Value (Small)	33736	36000	6.71093	6.71093
6	Broken	2	B1	Retrieve Value (Large)	594833	595000	0.0280751	0.0280751
6	Broken	2	B2	Retrieve Value (Large)	594833	590000	-0.812497	0.812497
6	Broken	2	B3	Retrieve Value (Large)	594833	593000	-0.308154	0.308154
6	Broken	2	B4	Retrieve Value (Large)	594833	590000	-0.812497	0.812497
6	Broken	2	B5	Retrieve Value (Large)	594833	590000	-0.812497	0.812497
6	Broken	2	B6	Retrieve Value (Large)	594833	587000	-1.31684	1.31684
6	Broken	2	B7	Retrieve Value (Large)	594833	595000	0.0280751	0.0280751
6	Broken	2	B8	Retrieve Value (Large)	594833	590000	-0.812497	0.812497
6	Broken	2	B9	Retrieve Value (Large)	594833	592000	-0.476268	0.476268
6	Broken	2	B10	Retrieve Value (Large)	594833	590000	-0.812497	0.812497
6	Broken	2	B11	Retrieve Value (Large)	594833	590000	-0.812497	0.812497
6	Broken	2	B12	Retrieve Value (Large)	594833	555000	-6.6965	6.6965
6	Broken	3	B1	DMD (Two Small Values)	10527	11000	4.49321	4.49321
6	Broken	3	B2	DMD (Two Small Values)	10527	15000	42.4907	42.4907
6	Broken	3	B3	DMD (Two Small Values)	10527	12000	13.9926	13.9926
6	Broken	3	B4	DMD (Two Small Values)	10527	15000	42.4907	42.4907
6	Broken	3	B5	DMD (Two Small Values)	10527	1000	-90.5006	90.5006
6	Broken	3	B6	DMD (Two Small Values)	10527	15000	42.4907	42.4907
6	Broken	3	B7	DMD (Two Small Values)	10527	11250	6.86805	6.86805
6	Broken	3	B8	DMD (Two Small Values)	10527	12500	18.7423	18.7423
6	Broken	3	B9	DMD (Two Small Values)	10527	11000	4.49321	4.49321
6	Broken	3	B10	DMD (Two Small Values)	10527	3000	-71.5019	71.5019
6	Broken	3	B11	DMD (Two Small Values)	10527	7100	-32.5544	32.5544
6	Broken	3	B12	DMD (Two Small Values)	10527	11200	6.39308	6.39308
6	Broken	4	B1	DMD (Small & Large Values)	16.2	20	23.4568	23.4568
6	Broken	4	B2	DMD (Small & Large Values)	16.2	9	-44.4444	44.4444
6	Broken	4	B3	DMD (Small & Large Values)	16.2	15.5	-4.32099	4.32099
6	Broken	4	B4	DMD (Small & Large Values)	16.2	16	-1.23457	1.23457
6	Broken	4	B5	DMD (Small & Large Values)	16.2	20	23.4568	23.4568
6	Broken	4	B6	DMD (Small & Large Values)	16.2	5	-69.1358	69.1358
6	Broken	4	B7	DMD (Small & Large Values)	16.2	15.9	-1.85185	1.85185
6	Broken	4	B8	DMD (Small & Large Values)	16.2	9	-44.4444	44.4444
6	Broken	4	B10	DMD (Small & Large Values)	16.2	3	-81.4815	81.4815
6	Broken	4	B11	DMD (Small & Large Values)	16.2	10.5	-35.1852	35.1852
6	Stepped	1	A1	Retrieve Value (Small)	33736	35000	3.74674	3.74674
6	Stepped	1	A2	Retrieve Value (Small)	33736	30000	-11.0742	11.0742
6	Stepped	1	A3	Retrieve Value (Small)	33736	32000	-5.14584	5.14584
6	Stepped	1	A4	Retrieve Value (Small)	33736	35000	3.74674	3.74674
6	Stepped	1	A5	Retrieve Value (Small)	33736	36750	8.93408	8.93408
6	Stepped	1	A6	Retrieve Value (Small)	33736	30000	-11.0742	11.0742
6	Stepped	1	A7	Retrieve Value (Small)	33736	35000	3.74674	3.74674
6	Stepped	1	A8	Retrieve Value (Small)	33736	35000	3.74674	3.74674
6	Stepped	1	A9	Retrieve Value (Small)	33736	35000	3.74674	3.74674
6	Stepped	1	A10	Retrieve Value (Small)	33736	34000	0.782547	0.782547
6	Stepped	1	A11	Retrieve Value (Small)	33736	32000	-5.14584	5.14584
6	Stepped	1	A12	Retrieve Value (Small)	33736	35000	3.74674	3.74674
6	Stepped	2	A1	Retrieve Value (Large)	594833	590000	-0.812497	0.812497
6	Stepped	2	A2	Retrieve Value (Large)	594833	500000	-15.9428	15.9428
6	Stepped	2	A3	Retrieve Value (Large)	594833	575000	-3.33421	3.33421
6	Stepped	2	A4	Retrieve Value (Large)	594833	575000	-3.33421	3.33421
6	Stepped	2	A5	Retrieve Value (Large)	594833	5750000	866.658	866.658
6	Stepped	2	A6	Retrieve Value (Large)	594833	550000	-7.53707	7.53707
6	Stepped	2	A7	Retrieve Value (Large)	594833	595000	0.0280751	0.0280751
6	Stepped	2	A8	Retrieve Value (Large)	594833	595000	0.0280751	0.0280751
6	Stepped	2	A9	Retrieve Value (Large)	594833	595000	0.0280751	0.0280751
6	Stepped	2	A10	Retrieve Value (Large)	594833	575000	-3.33421	3.33421
6	Stepped	2	A11	Retrieve Value (Large)	594833	580000	-2.49364	2.49364
6	Stepped	2	A12	Retrieve Value (Large)	594833	575000	-3.33421	3.33421
6	Stepped	3	A1	DMD (Two Small Values)	10527	5100	-51.5531	51.5531
6	Stepped	3	A2	DMD (Two Small Values)	10527	10000	-5.00617	5.00617
6	Stepped	3	A3	DMD (Two Small Values)	10527	8000	-24.0049	24.0049
6	Stepped	3	A4	DMD (Two Small Values)	10527	15000	42.4907	42.4907
6	Stepped	3	A5	DMD (Two Small Values)	10527	15000	42.4907	42.4907
6	Stepped	3	A6	DMD (Two Small Values)	10527	15000	42.4907	42.4907
6	Stepped	3	A7	DMD (Two Small Values)	10527	10000	-5.00617	5.00617
6	Stepped	3	A8	DMD (Two Small Values)	10527	10000	-5.00617	5.00617
6	Stepped	3	A9	DMD (Two Small Values)	10527	13000	23.492	23.492
6	Stepped	3	A10	DMD (Two Small Values)	10527	27000	156.483	156.483
6	Stepped	3	A11	DMD (Two Small Values)	10527	12000	13.9926	13.9926
6	Stepped	3	A12	DMD (Two Small Values)	10527	35000	232.478	232.478
6	Stepped	4	A2	DMD (Small & Large Values)	16.2	20	23.4568	23.4568
6	Stepped	4	A3	DMD (Small & Large Values)	16.2	15	-7.40741	7.40741
6	Stepped	4	A4	DMD (Small & Large Values)	16.2	17	4.93827	4.93827
6	Stepped	4	A5	DMD (Small & Large Values)	16.2	17	4.93827	4.93827
6	Stepped	4	A6	DMD (Small & Large Values)	16.2	16	-1.23457	1.23457
6	Stepped	4	A7	DMD (Small & Large Values)	16.2	16	-1.23457	1.23457
6	Stepped	4	A8	DMD (Small & Large Values)	16.2	16.5	1.85185	1.85185
6	Stepped	4	A9	DMD (Small & Large Values)	16.2	15	-7.40741	7.40741
6	Stepped	4	A10	DMD (Small & Large Values)	16.2	10	-38.2716	38.2716
6	Stepped	4	A11	DMD (Small & Large Values)	16.2	20	23.4568	23.4568
6	Stepped	4	A12	DMD (Small & Large Values)	16.2	17	4.93827	4.93827
7	Radial	1	A1	Retrieve Value (Small)	14	14	0	0
7	Radial	1	A2	Retrieve Value (Small)	14	13.5	-3.57143	3.57143
7	Radial	1	A3	Retrieve Value (Small)	14	14.5	3.57143	3.57143
7	Radial	1	A4	Retrieve Value (Small)	14	12	-14.2857	14.2857
7	Radial	1	A5	Retrieve Value (Small)	14	14	0	0
7	Radial	1	A6	Retrieve Value (Small)	14	14	0	0
7	Radial	1	A7	Retrieve Value (Small)	14	14	0	0
7	Radial	1	A8	Retrieve Value (Small)	14	14	0	0
7	Radial	1	A9	Retrieve Value (Small)	14	14	0	0
7	Radial	1	A10	Retrieve Value (Small)	14	13	-7.14286	7.14286
7	Radial	1	A11	Retrieve Value (Small)	14	14	0	0
7	Radial	1	A12	Retrieve Value (Small)	14	14	0	0
7	Radial	2	A1	DMD (Small & Large Values)	73.1	73	-0.136799	0.136799
7	Radial	2	A2	DMD (Small & Large Values)	73.1	73	-0.136799	0.136799
7	Radial	2	A3	DMD (Small & Large Values)	73.1	73	-0.136799	0.136799
7	Radial	2	A4	DMD (Small & Large Values)	73.1	72	-1.50479	1.50479
7	Radial	2	A5	DMD (Small & Large Values)	73.1	73	-0.136799	0.136799
7	Radial	2	A6	DMD (Small & Large Values)	73.1	73	-0.136799	0.136799
7	Radial	2	A7	DMD (Small & Large Values)	73.1	73	-0.136799	0.136799
7	Radial	2	A8	DMD (Small & Large Values)	73.1	74	1.23119	1.23119
7	Radial	2	A9	DMD (Small & Large Values)	73.1	75	2.59918	2.59918
7	Radial	2	A10	DMD (Small & Large Values)	73.1	70	-4.24077	4.24077
7	Radial	2	A11	DMD (Small & Large Values)	73.1	73	-0.136799	0.136799
7	Radial	2	A12	DMD (Small & Large Values)	73.1	53	-27.4966	27.4966
7	Radial	3	A1	DMD (Two Small Values)	1.13	1.2	6.19469	6.19469
7	Radial	3	A2	DMD (Two Small Values)	1.13	1.1	-2.65487	2.65487
7	Radial	3	A3	DMD (Two Small Values)	1.13	1.1	-2.65487	2.65487
7	Radial	3	A4	DMD (Two Small Values)	1.13	1	-11.5044	11.5044
7	Radial	3	A5	DMD (Two Small Values)	1.13	1.5	32.7434	32.7434
7	Radial	3	A6	DMD (Two Small Values)	1.13	1.2	6.19469	6.19469
7	Radial	3	A7	DMD (Two Small Values)	1.13	1.1	-2.65487	2.65487
7	Radial	3	A8	DMD (Two Small Values)	1.13	1.05	-7.07965	7.07965
7	Radial	3	A9	DMD (Two Small Values)	1.13	1.15	1.76991	1.76991
7	Radial	3	A10	DMD (Two Small Values)	1.13	15	1227.43	1227.43
7	Radial	3	A11	DMD (Two Small Values)	1.13	1.08	-4.42478	4.42478
7	Radial	3	A12	DMD (Two Small Values)	1.13	1.2	6.19469	6.19469
7	Radial	4	A1	Sort	12	11	-8.33333	8.33333
7	Radial	4	A2	Sort	12	12	0	0
7	Radial	4	A3	Sort	12	12	0	0
7	Radial	4	A4	Sort	12	12	0	0
7	Radial	4	A5	Sort	12	12	0	0
7	Radial	4	A6	Sort	12	12	0	0
7	Radial	4	A7	Sort	12	12	0	0
7	Radial	4	A8	Sort	12	12	0	0
7	Radial	4	A9	Sort	12	12	0	0
7	Radial	4	A10	Sort	12	11	-8.33333	8.33333
7	Radial	4	A11	Sort	12	12	0	0
7	Radial	4	A12	Sort	12	12	0	0
7	Circular	1	B1	Retrieve Value (Small)	14	15	7.14286	7.14286
7	Circular	1	B2	Retrieve Value (Small)	14	15	7.14286	7.14286
7	Circular	1	B3	Retrieve Value (Small)	14	14	0	0
7	Circular	1	B4	Retrieve Value (Small)	14	15	7.14286	7.14286
7	Circular	1	B5	Retrieve Value (Small)	14	15	7.14286	7.14286
7	Circular	1	B6	Retrieve Value (Small)	14	15	7.14286	7.14286
7	Circular	1	B7	Retrieve Value (Small)	14	15	7.14286	7.14286
7	Circular	1	B8	Retrieve Value (Small)	14	15	7.14286	7.14286
7	Circular	1	B9	Retrieve Value (Small)	14	15	7.14286	7.14286
7	Circular	1	B10	Retrieve Value (Small)	14	15	7.14286	7.14286
7	Circular	1	B11	Retrieve Value (Small)	14	15	7.14286	7.14286
7	Circular	1	B12	Retrieve Value (Small)	14	10.5	-25	25
7	Circular	2	B1	DMD (Small & Large Values)	73.1	74	1.23119	1.23119
7	Circular	2	B2	DMD (Small & Large Values)	73.1	60	-17.9207	17.9207
7	Circular	2	B3	DMD (Small & Large Values)	73.1	73	-0.136799	0.136799
7	Circular	2	B4	DMD (Small & Large Values)	73.1	85	16.2791	16.2791
7	Circular	2	B5	DMD (Small & Large Values)	73.1	75	2.59918	2.59918
7	Circular	2	B6	DMD (Small & Large Values)	73.1	75	2.59918	2.59918
7	Circular	2	B7	DMD (Small & Large Values)	73.1	74	1.23119	1.23119
7	Circular	2	B8	DMD (Small & Large Values)	73.1	75	2.59918	2.59918
7	Circular	2	B9	DMD (Small & Large Values)	73.1	75	2.59918	2.59918
7	Circular	2	B10	DMD (Small & Large Values)	73.1	75	2.59918	2.59918
7	Circular	2	B11	DMD (Small & Large Values)	73.1	64	-12.4487	12.4487
7	Circular	2	B12	DMD (Small & Large Values)	73.1	79.5	8.75513	8.75513
7	Circular	3	B1	DMD (Two Small Values)	1.13	1.1	-2.65487	2.65487
7	Circular	3	B2	DMD (Two Small Values)	1.13	2	76.9912	76.9912
7	Circular	3	B3	DMD (Two Small Values)	1.13	1.16	2.65487	2.65487
7	Circular	3	B4	DMD (Two Small Values)	1.13	1.3	15.0442	15.0442
7	Circular	3	B5	DMD (Two Small Values)	1.13	0.83	-26.5487	26.5487
7	Circular	3	B6	DMD (Two Small Values)	1.13	0.1	-91.1504	91.1504
7	Circular	3	B7	DMD (Two Small Values)	1.13	1.2	6.19469	6.19469
7	Circular	3	B8	DMD (Two Small Values)	1.13	1.2	6.19469	6.19469
7	Circular	3	B9	DMD (Two Small Values)	1.13	1.17	3.53982	3.53982
7	Circular	3	B10	DMD (Two Small Values)	1.13	0.25	-77.8761	77.8761
7	Circular	3	B11	DMD (Two Small Values)	1.13	0.25	-77.8761	77.8761
7	Circular	3	B12	DMD (Two Small Values)	1.13	1.75	54.8673	54.8673
7	Circular	4	B1	Sort	12	12	0	0
7	Circular	4	B2	Sort	12	12	0	0
7	Circular	4	B3	Sort	12	12	0	0
7	Circular	4	B4	Sort	12	11	-8.33333	8.33333
7	Circular	4	B5	Sort	12	11	-8.33333	8.33333
7	Circular	4	B6	Sort	12	12	0	0
7	Circular	4	B7	Sort	12	11	-8.33333	8.33333
7	Circular	4	B8	Sort	12	12	0	0
7	Circular	4	B9	Sort	12	12	0	0
7	Circular	4	B10	Sort	12	11	-8.33333	8.33333
7	Circular	4	B11	Sort	12	11	-8.33333	8.33333
7	Circular	4	B12	Sort	12	12	0	0
8	Radial	1	B1	Retrieve Value (Small)	18	17	-5.55556	5.55556
8	Radial	1	B2	Retrieve Value (Small)	18	18	0	0
8	Radial	1	B3	Retrieve Value (Small)	18	18	0	0
8	Radial	1	B4	Retrieve Value (Small)	18	18	0	0
8	Radial	1	B5	Retrieve Value (Small)	18	18	0	0
8	Radial	1	B6	Retrieve Value (Small)	18	18	0	0
8	Radial	1	B7	Retrieve Value (Small)	18	18.5	2.77778	2.77778
8	Radial	1	B8	Retrieve Value (Small)	18	17.5	-2.77778	2.77778
8	Radial	1	B9	Retrieve Value (Small)	18	18	0	0
8	Radial	1	B10	Retrieve Value (Small)	18	18	0	0
8	Radial	1	B11	Retrieve Value (Small)	18	19	5.55556	5.55556
8	Radial	1	B12	Retrieve Value (Small)	18	17	-5.55556	5.55556
8	Radial	2	B1	DMD (Small & Large Values)	3	3	0	0
8	Radial	2	B2	DMD (Small & Large Values)	3	4	33.3333	33.3333
8	Radial	2	B3	DMD (Small & Large Values)	3	3	0	0
8	Radial	2	B4	DMD (Small & Large Values)	3	3	0	0
8	Radial	2	B5	DMD (Small & Large Values)	3	1	-66.6667	66.6667
8	Radial	2	B6	DMD (Small & Large Values)	3	1	-66.6667	66.6667
8	Radial	2	B7	DMD (Small & Large Values)	3	3	0	0
8	Radial	2	B8	DMD (Small & Large Values)	3	2.5	-16.6667	16.6667
8	Radial	2	B9	DMD (Small & Large Values)	3	2	-33.3333	33.3333
8	Radial	2	B10	DMD (Small & Large Values)	3	3	0	0
8	Radial	2	B11	DMD (Small & Large Values)	3	4	33.3333	33.3333
8	Radial	2	B12	DMD (Small & Large Values)	3	2	-33.3333	33.3333
8	Radial	3	B1	DMD (Two Small Values)	2.29	2.5	9.17031	9.17031
8	Radial	3	B2	DMD (Two Small Values)	2.29	4	74.6725	74.6725
8	Radial	3	B4	DMD (Two Small Values)	2.29	2.2	-3.93013	3.93013
8	Radial	3	B5	DMD (Two Small Values)	2.29	2	-12.6638	12.6638
8	Radial	3	B6	DMD (Two Small Values)	2.29	4	74.6725	74.6725
8	Radial	3	B7	DMD (Two Small Values)	2.29	2.3	0.436681	0.436681
8	Radial	3	B8	DMD (Two Small Values)	2.29	3.33	45.4148	45.4148
8	Radial	3	B9	DMD (Two Small Values)	2.29	2.2	-3.93013	3.93013
8	Radial	3	B10	DMD (Two Small Values)	2.29	0.5	-78.1659	78.1659
8	Radial	3	B11	DMD (Two Small Values)	2.29	2.5	9.17031	9.17031
8	Radial	3	B12	DMD (Two Small Values)	2.29	5	118.341	118.341
8	Radial	4	B1	Sort	12	12	0	0
8	Radial	4	B2	Sort	12	10	-16.6667	16.6667
8	Radial	4	B3	Sort	12	12	0	0
8	Radial	4	B4	Sort	12	12	0	0
8	Radial	4	B5	Sort	12	10	-16.6667	16.6667
8	Radial	4	B6	Sort	12	12	0	0
8	Radial	4	B7	Sort	12	12	0	0
8	Radial	4	B8	Sort	12	12	0	0
8	Radial	4	B9	Sort	12	12	0	0
8	Radial	4	B10	Sort	12	12	0	0
8	Radial	4	B11	Sort	12	12	0	0
8	Radial	4	B12	Sort	12	11	-8.33333	8.33333
8	Circular	1	A1	Retrieve Value (Small)	18	19	5.55556	5.55556
8	Circular	1	A2	Retrieve Value (Small)	18	18	0	0
8	Circular	1	A3	Retrieve Value (Small)	18	18	0	0
8	Circular	1	A4	Retrieve Value (Small)	18	18	0	0
8	Circular	1	A5	Retrieve Value (Small)	18	18	0	0
8	Circular	1	A6	Retrieve Value (Small)	18	19	5.55556	5.55556
8	Circular	1	A7	Retrieve Value (Small)	18	19	5.55556	5.55556
8	Circular	1	A8	Retrieve Value (Small)	18	18	0	0
8	Circular	1	A9	Retrieve Value (Small)	18	18	0	0
8	Circular	1	A10	Retrieve Value (Small)	18	17	-5.55556	5.55556
8	Circular	1	A11	Retrieve Value (Small)	18	18	0	0
8	Circular	1	A12	Retrieve Value (Small)	18	18	0	0
8	Circular	2	A1	DMD (Small & Large Values)	3	12.5	316.667	316.667
8	Circular	2	A2	DMD (Small & Large Values)	3	3	0	0
8	Circular	2	A3	DMD (Small & Large Values)	3	3.5	16.6667	16.6667
8	Circular	2	A4	DMD (Small & Large Values)	3	5	66.6667	66.6667
8	Circular	2	A5	DMD (Small & Large Values)	3	3	0	0
8	Circular	2	A6	DMD (Small & Large Values)	3	5	66.6667	66.6667
8	Circular	2	A7	DMD (Small & Large Values)	3	3	0	0
8	Circular	2	A8	DMD (Small & Large Values)	3	3.5	16.6667	16.6667
8	Circular	2	A9	DMD (Small & Large Values)	3	35	1066.67	1066.67
8	Circular	2	A10	DMD (Small & Large Values)	3	3	0	0
8	Circular	2	A11	DMD (Small & Large Values)	3	4.5	50	50
8	Circular	2	A12	DMD (Small & Large Values)	3	3	0	0
8	Circular	3	A2	DMD (Two Small Values)	2.29	2	-12.6638	12.6638
8	Circular	3	A3	DMD (Two Small Values)	2.29	2.1	-8.29694	8.29694
8	Circular	3	A4	DMD (Two Small Values)	2.29	2.5	9.17031	9.17031
8	Circular	3	A5	DMD (Two Small Values)	2.29	2	-12.6638	12.6638
8	Circular	3	A6	DMD (Two Small Values)	2.29	2	-12.6638	12.6638
8	Circular	3	A7	DMD (Two Small Values)	2.29	2	-12.6638	12.6638
8	Circular	3	A8	DMD (Two Small Values)	2.29	2.2	-3.93013	3.93013
8	Circular	3	A9	DMD (Two Small Values)	2.29	2.5	9.17031	9.17031
8	Circular	3	A10	DMD (Two Small Values)	2.29	7	205.677	205.677
8	Circular	3	A11	DMD (Two Small Values)	2.29	2.2	-3.93013	3.93013
8	Circular	3	A12	DMD (Two Small Values)	2.29	2	-12.6638	12.6638
8	Circular	4	A1	Sort	12	11	-8.33333	8.33333
8	Circular	4	A2	Sort	12	11	-8.33333	8.33333
8	Circular	4	A3	Sort	12	12	0	0
8	Circular	4	A4	Sort	12	11	-8.33333	8.33333
8	Circular	4	A5	Sort	12	11	-8.33333	8.33333
8	Circular	4	A6	Sort	12	11	-8.33333	8.33333
8	Circular	4	A7	Sort	12	11	-8.33333	8.33333
8	Circular	4	A8	Sort	12	11	-8.33333	8.33333
8	Circular	4	A9	Sort	12	11	-8.33333	8.33333
8	Circular	4	A11	Sort	12	10	-16.6667	16.6667
8	Circular	4	A12	Sort	12	12	0	0
9	Traditional Bar	1	A1	Retrieve Value (Small)	7.2	7	-2.77778	2.77778
9	Traditional Bar	1	A2	Retrieve Value (Small)	7.2	7	-2.77778	2.77778
9	Traditional Bar	1	A3	Retrieve Value (Small)	7.2	7.5	4.16667	4.16667
9	Traditional Bar	1	A4	Retrieve Value (Small)	7.2	7	-2.77778	2.77778
9	Traditional Bar	1	A5	Retrieve Value (Small)	7.2	7	-2.77778	2.77778
9	Traditional Bar	1	A6	Retrieve Value (Small)	7.2	7	-2.77778	2.77778
9	Traditional Bar	1	A7	Retrieve Value (Small)	7.2	7	-2.77778	2.77778
9	Traditional Bar	1	A8	Retrieve Value (Small)	7.2	7	-2.77778	2.77778
9	Traditional Bar	1	A9	Retrieve Value (Small)	7.2	7	-2.77778	2.77778
9	Traditional Bar	1	A10	Retrieve Value (Small)	7.2	7	-2.77778	2.77778
9	Traditional Bar	1	A11	Retrieve Value (Small)	7.2	6.8	-5.55556	5.55556
9	Traditional Bar	1	A12	Retrieve Value (Small)	7.2	7	-2.77778	2.77778
9	Traditional Bar	2	A1	DMD (Two Small Values)	1.3	1.5	15.3846	15.3846
9	Traditional Bar	2	A2	DMD (Two Small Values)	1.3	2	53.8462	53.8462
9	Traditional Bar	2	A3	DMD (Two Small Values)	1.3	1.5	15.3846	15.3846
9	Traditional Bar	2	A4	DMD (Two Small Values)	1.3	1	-23.0769	23.0769
9	Traditional Bar	2	A5	DMD (Two Small Values)	1.3	1	-23.0769	23.0769
9	Traditional Bar	2	A6	DMD (Two Small Values)	1.3	1	-23.0769	23.0769
9	Traditional Bar	2	A7	DMD (Two Small Values)	1.3	0	-100	100
9	Traditional Bar	2	A8	DMD (Two Small Values)	1.3	1	-23.0769	23.0769
9	Traditional Bar	2	A9	DMD (Two Small Values)	1.3	2	53.8462	53.8462
9	Traditional Bar	2	A10	DMD (Two Small Values)	1.3	2	53.8462	53.8462
9	Traditional Bar	2	A11	DMD (Two Small Values)	1.3	1.2	-7.69231	7.69231
9	Traditional Bar	2	A12	DMD (Two Small Values)	1.3	2	53.8462	53.8462
9	Traditional Bar	3	A1	DMD (Small & Large Values)	13.4	13	-2.98507	2.98507
9	Traditional Bar	3	A2	DMD (Small & Large Values)	13.4	13	-2.98507	2.98507
9	Traditional Bar	3	A3	DMD (Small & Large Values)	13.4	14	4.47761	4.47761
9	Traditional Bar	3	A4	DMD (Small & Large Values)	13.4	13	-2.98507	2.98507
9	Traditional Bar	3	A5	DMD (Small & Large Values)	13.4	16	19.403	19.403
9	Traditional Bar	3	A6	DMD (Small & Large Values)	13.4	13	-2.98507	2.98507
9	Traditional Bar	3	A7	DMD (Small & Large Values)	13.4	13	-2.98507	2.98507
9	Traditional Bar	3	A8	DMD (Small & Large Values)	13.4	12.8	-4.47761	4.47761
9	Traditional Bar	3	A9	DMD (Small & Large Values)	13.4	13	-2.98507	2.98507
9	Traditional Bar	3	A10	DMD (Small & Large Values)	13.4	18	34.3284	34.3284
9	Traditional Bar	3	A11	DMD (Small & Large Values)	13.4	12	-10.4478	10.4478
9	Traditional Bar	3	A12	DMD (Small & Large Values)	13.4	13	-2.98507	2.98507
9	Traditional Bar	4	A1	Filter	12	11	-8.33333	8.33333
9	Traditional Bar	4	A2	Filter	12	7	-41.6667	41.6667
9	Traditional Bar	4	A3	Filter	12	12	0	0
9	Traditional Bar	4	A4	Filter	12	10	-16.6667	16.6667
9	Traditional Bar	4	A5	Filter	12	9	-25	25
9	Traditional Bar	4	A6	Filter	12	10	-16.6667	16.6667
9	Traditional Bar	4	A7	Filter	12	12	0	0
9	Traditional Bar	4	A8	Filter	12	12	0	0
9	Traditional Bar	4	A9	Filter	12	12	0	0
9	Traditional Bar	4	A10	Filter	12	9	-25	25
9	Traditional Bar	4	A11	Filter	12	12	0	0
9	Traditional Bar	4	A12	Filter	12	8	-33.3333	33.3333
9	Circular	1	B1	Retrieve Value (Small)	7.2	7.3	1.38889	1.38889
9	Circular	1	B2	Retrieve Value (Small)	7.2	15	108.333	108.333
9	Circular	1	B3	Retrieve Value (Small)	7.2	7	-2.77778	2.77778
9	Circular	1	B4	Retrieve Value (Small)	7.2	7.5	4.16667	4.16667
9	Circular	1	B5	Retrieve Value (Small)	7.2	7	-2.77778	2.77778
9	Circular	1	B6	Retrieve Value (Small)	7.2	6.5	-9.72222	9.72222
9	Circular	1	B7	Retrieve Value (Small)	7.2	7.5	4.16667	4.16667
9	Circular	1	B8	Retrieve Value (Small)	7.2	7	-2.77778	2.77778
9	Circular	1	B9	Retrieve Value (Small)	7.2	7	-2.77778	2.77778
9	Circular	1	B10	Retrieve Value (Small)	7.2	6	-16.6667	16.6667
9	Circular	1	B11	Retrieve Value (Small)	7.2	7.5	4.16667	4.16667
9	Circular	1	B12	Retrieve Value (Small)	7.2	10	38.8889	38.8889
9	Circular	2	B1	DMD (Two Small Values)	1.3	1	-23.0769	23.0769
9	Circular	2	B2	DMD (Two Small Values)	1.3	4	207.692	207.692
9	Circular	2	B3	DMD (Two Small Values)	1.3	1	-23.0769	23.0769
9	Circular	2	B4	DMD (Two Small Values)	1.3	2	53.8462	53.8462
9	Circular	2	B5	DMD (Two Small Values)	1.3	2	53.8462	53.8462
9	Circular	2	B6	DMD (Two Small Values)	1.3	1	-23.0769	23.0769
9	Circular	2	B7	DMD (Two Small Values)	1.3	1	-23.0769	23.0769
9	Circular	2	B8	DMD (Two Small Values)	1.3	1	-23.0769	23.0769
9	Circular	2	B9	DMD (Two Small Values)	1.3	1.2	-7.69231	7.69231
9	Circular	2	B10	DMD (Two Small Values)	1.3	0.8	-38.4615	38.4615
9	Circular	2	B11	DMD (Two Small Values)	1.3	1.5	15.3846	15.3846
9	Circular	2	B12	DMD (Two Small Values)	1.3	1	-23.0769	23.0769
9	Circular	3	B1	DMD (Small & Large Values)	13.4	16	19.403	19.403
9	Circular	3	B2	DMD (Small & Large Values)	13.4	17	26.8657	26.8657
9	Circular	3	B3	DMD (Small & Large Values)	13.4	13.5	0.746269	0.746269
9	Circular	3	B4	DMD (Small & Large Values)	13.4	10	-25.3731	25.3731
9	Circular	3	B5	DMD (Small & Large Values)	13.4	16	19.403	19.403
9	Circular	3	B6	DMD (Small & Large Values)	13.4	10	-25.3731	25.3731
9	Circular	3	B7	DMD (Small & Large Values)	13.4	12.5	-6.71642	6.71642
9	Circular	3	B8	DMD (Small & Large Values)	13.4	15	11.9403	11.9403
9	Circular	3	B9	DMD (Small & Large Values)	13.4	12	-10.4478	10.4478
9	Circular	3	B10	DMD (Small & Large Values)	13.4	4	-70.1493	70.1493
9	Circular	3	B11	DMD (Small & Large Values)	13.4	13	-2.98507	2.98507
9	Circular	3	B12	DMD (Small & Large Values)	13.4	75	459.701	459.701
9	Circular	4	B1	Filter	12	12	0	0
9	Circular	4	B2	Filter	12	4	-66.6667	66.6667
9	Circular	4	B3	Filter	12	12	0	0
9	Circular	4	B4	Filter	12	12	0	0
9	Circular	4	B5	Filter	12	11	-8.33333	8.33333
9	Circular	4	B6	Filter	12	12	0	0
9	Circular	4	B7	Filter	12	12	0	0
9	Circular	4	B8	Filter	12	9	-25	25
9	Circular	4	B9	Filter	12	12	0	0
9	Circular	4	B10	Filter	12	10	-16.6667	16.6667
9	Circular	4	B11	Filter	12	11	-8.33333	8.33333
9	Circular	4	B12	Filter	12	12	0	0
10	Traditional Bar	1	B1	Retrieve Value (Small)	15.7	16	1.91083	1.91083
10	Traditional Bar	1	B2	Retrieve Value (Small)	15.7	15	-4.4586	4.4586
10	Traditional Bar	1	B3	Retrieve Value (Small)	15.7	16	1.91083	1.91083
10	Traditional Bar	1	B4	Retrieve Value (Small)	15.7	16	1.91083	1.91083
10	Traditional Bar	1	B5	Retrieve Value (Small)	15.7	18	14.6497	14.6497
10	Traditional Bar	1	B6	Retrieve Value (Small)	15.7	10.5	-33.121	33.121
10	Traditional Bar	1	B7	Retrieve Value (Small)	15.7	16	1.91083	1.91083
10	Traditional Bar	1	B8	Retrieve Value (Small)	15.7	17	8.28025	8.28025
10	Traditional Bar	1	B9	Retrieve Value (Small)	15.7	16	1.91083	1.91083
10	Traditional Bar	1	B10	Retrieve Value (Small)	15.7	15	-4.4586	4.4586
10	Traditional Bar	1	B11	Retrieve Value (Small)	15.7	15	-4.4586	4.4586
10	Traditional Bar	1	B12	Retrieve Value (Small)	15.7	16	1.91083	1.91083
10	Traditional Bar	2	B1	DMD (Two Small Values)	13.2	13	-1.51515	1.51515
10	Traditional Bar	2	B2	DMD (Two Small Values)	13.2	12	-9.09091	9.09091
10	Traditional Bar	2	B3	DMD (Two Small Values)	13.2	13	-1.51515	1.51515
10	Traditional Bar	2	B4	DMD (Two Small Values)	13.2	22	66.6667	66.6667
10	Traditional Bar	2	B5	DMD (Two Small Values)	13.2	3	-77.2727	77.2727
10	Traditional Bar	2	B6	DMD (Two Small Values)	13.2	10	-24.2424	24.2424
10	Traditional Bar	2	B7	DMD (Two Small Values)	13.2	12.5	-5.30303	5.30303
10	Traditional Bar	2	B8	DMD (Two Small Values)	13.2	12	-9.09091	9.09091
10	Traditional Bar	2	B9	DMD (Two Small Values)	13.2	12.5	-5.30303	5.30303
10	Traditional Bar	2	B10	DMD (Two Small Values)	13.2	14	6.06061	6.06061
10	Traditional Bar	2	B11	DMD (Two Small Values)	13.2	11.5	-12.8788	12.8788
10	Traditional Bar	2	B12	DMD (Two Small Values)	13.2	13	-1.51515	1.51515
10	Traditional Bar	3	B1	DMD (Small & Large Values)	8.42	7.5	-10.9264	10.9264
10	Traditional Bar	3	B2	DMD (Small & Large Values)	8.42	13	54.3943	54.3943
10	Traditional Bar	3	B3	DMD (Small & Large Values)	8.42	8	-4.98812	4.98812
10	Traditional Bar	3	B4	DMD (Small & Large Values)	8.42	17.5	107.838	107.838
10	Traditional Bar	3	B5	DMD (Small & Large Values)	8.42	7.5	-10.9264	10.9264
10	Traditional Bar	3	B6	DMD (Small & Large Values)	8.42	14	66.2708	66.2708
10	Traditional Bar	3	B7	DMD (Small & Large Values)	8.42	8.3	-1.42518	1.42518
10	Traditional Bar	3	B8	DMD (Small & Large Values)	8.42	7	-16.8646	16.8646
10	Traditional Bar	3	B9	DMD (Small & Large Values)	8.42	8	-4.98812	4.98812
10	Traditional Bar	3	B10	DMD (Small & Large Values)	8.42	5	-40.6176	40.6176
10	Traditional Bar	3	B11	DMD (Small & Large Values)	8.42	5.5	-34.6793	34.6793
10	Traditional Bar	3	B12	DMD (Small & Large Values)	8.42	135	1503.33	1503.33
10	Traditional Bar	4	B1	Filter	11	10	-9.09091	9.09091
10	Traditional Bar	4	B2	Filter	11	10	-9.09091	9.09091
10	Traditional Bar	4	B3	Filter	11	11	0	0
10	Traditional Bar	4	B4	Filter	11	10	-9.09091	9.09091
10	Traditional Bar	4	B5	Filter	11	11	0	0
10	Traditional Bar	4	B6	Filter	11	11	0	0
10	Traditional Bar	4	B7	Filter	11	10	-9.09091	9.09091
10	Traditional Bar	4	B8	Filter	11	12	9.09091	9.09091
10	Traditional Bar	4	B9	Filter	11	10	-9.09091	9.09091
10	Traditional Bar	4	B10	Filter	11	10	-9.09091	9.09091
10	Traditional Bar	4	B11	Filter	11	10	-9.09091	9.09091
10	Traditional Bar	4	B12	Filter	11	10	-9.09091	9.09091
10	Circular	1	A1	Retrieve Value (Small)	15.7	16	1.91083	1.91083
10	Circular	1	A2	Retrieve Value (Small)	15.7	16	1.91083	1.91083
10	Circular	1	A3	Retrieve Value (Small)	15.7	16	1.91083	1.91083
10	Circular	1	A4	Retrieve Value (Small)	15.7	16	1.91083	1.91083
10	Circular	1	A5	Retrieve Value (Small)	15.7	16	1.91083	1.91083
10	Circular	1	A6	Retrieve Value (Small)	15.7	12	-23.5669	23.5669
10	Circular	1	A7	Retrieve Value (Small)	15.7	16	1.91083	1.91083
10	Circular	1	A8	Retrieve Value (Small)	15.7	6	-61.7834	61.7834
10	Circular	1	A9	Retrieve Value (Small)	15.7	15	-4.4586	4.4586
10	Circular	1	A10	Retrieve Value (Small)	15.7	17	8.28025	8.28025
10	Circular	1	A11	Retrieve Value (Small)	15.7	17	8.28025	8.28025
10	Circular	1	A12	Retrieve Value (Small)	15.7	15	-4.4586	4.4586
10	Circular	2	A1	DMD (Two Small Values)	13.2	13	-1.51515	1.51515
10	Circular	2	A2	DMD (Two Small Values)	13.2	13	-1.51515	1.51515
10	Circular	2	A3	DMD (Two Small Values)	13.2	13	-1.51515	1.51515
10	Circular	2	A4	DMD (Two Small Values)	13.2	1	-92.4242	92.4242
10	Circular	2	A5	DMD (Two Small Values)	13.2	14	6.06061	6.06061
10	Circular	2	A6	DMD (Two Small Values)	13.2	13	-1.51515	1.51515
10	Circular	2	A7	DMD (Two Small Values)	13.2	22	66.6667	66.6667
10	Circular	2	A8	DMD (Two Small Values)	13.2	12	-9.09091	9.09091
10	Circular	2	A9	DMD (Two Small Values)	13.2	13	-1.51515	1.51515
10	Circular	2	A10	DMD (Two Small Values)	13.2	16	21.2121	21.2121
10	Circular	2	A11	DMD (Two Small Values)	13.2	14	6.06061	6.06061
10	Circular	2	A12	DMD (Two Small Values)	13.2	10	-24.2424	24.2424
10	Circular	3	A1	DMD (Small & Large Values)	8.42	8.4	-0.23753	0.23753
10	Circular	3	A2	DMD (Small & Large Values)	8.42	4.4	-47.7435	47.7435
10	Circular	3	A3	DMD (Small & Large Values)	8.42	9.5	12.8266	12.8266
10	Circular	3	A4	DMD (Small & Large Values)	8.42	8	-4.98812	4.98812
10	Circular	3	A5	DMD (Small & Large Values)	8.42	8.9	5.70071	5.70071
10	Circular	3	A6	DMD (Small & Large Values)	8.42	8.5	0.950119	0.950119
10	Circular	3	A7	DMD (Small & Large Values)	8.42	13	54.3943	54.3943
10	Circular	3	A8	DMD (Small & Large Values)	8.42	8.5	0.950119	0.950119
10	Circular	3	A9	DMD (Small & Large Values)	8.42	13	54.3943	54.3943
10	Circular	3	A10	DMD (Small & Large Values)	8.42	20	137.53	137.53
10	Circular	3	A11	DMD (Small & Large Values)	8.42	8	-4.98812	4.98812
10	Circular	3	A12	DMD (Small & Large Values)	8.42	8	-4.98812	4.98812
10	Circular	4	A1	Filter	11	12	9.09091	9.09091
10	Circular	4	A2	Filter	11	9	-18.1818	18.1818
10	Circular	4	A3	Filter	11	11	0	0
10	Circular	4	A4	Filter	11	10	-9.09091	9.09091
10	Circular	4	A5	Filter	11	11	0	0
10	Circular	4	A6	Filter	11	11	0	0
10	Circular	4	A7	Filter	11	11	0	0
10	Circular	4	A8	Filter	11	10	-9.09091	9.09091
10	Circular	4	A9	Filter	11	11	0	0
10	Circular	4	A10	Filter	11	13	18.1818	18.1818
10	Circular	4	A11	Filter	11	11	0	0
10	Circular	4	A12	Filter	11	8	-27.2727	27.2727

## Sheet: Averages
Section	Chart	Question	Taxonomy	Directional average error	Directional median	Absolute average error	Absolute median	Standard deviation	Observations
1 & 2	Traditional Bar	1	Retrieve Value (Small)	48.9005	4.49624	63.0641	13.4456	208.269
1 & 2	Slanted	1	Retrieve Value (Small)	59.4231	9.57592	74.5194	13.4456	185.406
1 & 2	Traditional Bar	2	DMD (Two Small Values)	108.591	-5.58775	138.86	29.0777
1 & 2	Slanted	2	DMD (Two Small Values)	1.67496	-6.12532	34.9437	17.3433
1 & 2	Traditional Bar	3	DMD (Small & Large Values)	-3.37631	-8.49673	24.6038	14.5299
1 & 2	Slanted	3	DMD (Small & Large Values)	8.728	-0.232529	20.7466	6.83761
1 & 2	Traditional Bar	4	Find Extremum	25.8687	-1.99745	42.8881	2.43989
1 & 2	Slanted	4	Find Extremum	19.6885	-3.10069	60.5088	8.64826
1 & 2	Traditional Bar	5	Filter	-3.34596	0	10.2904	9.09091
1 & 2	Slanted	5	Filter	-9.65909	0	17.3611	12.8788
3 & 4	Scale-Stack	1	Retrieve Value (Small)	145.573	6.76741	157.557	31.406
3 & 4	Stepped	1	Retrieve Value (Small)	81.2628	6.20221	98.2777	13.1406
3 & 4	Scale-Stack	2	DMD (Two Small Values)	60.8317	7.12999	85.6035	29.6375
3 & 4	Stepped	2	DMD (Two Small Values)	6.06631	2.30702	19.426	10.0397
3 & 4	Scale-Stack	3	DMD (Small & Large Values)	-18.9028	-44.4444	73.5029	48.7179
3 & 4	Stepped	3	DMD (Small & Large Values)	-18.0525	-2.72374	28.5318	11.8677
3 & 4	Scale-Stack	4	Find Extremum	55.1872	-5.14266	86.848	12.1171
3 & 4	Stepped	4	Find Extremum	-1.53573	-0.527796	1.57972	0.527796
5 & 6	Broken-axis	1	Retrieve Value (Small)	33.2544	1.25785	53.5522	5.07699
5 & 6	Stepped	1	Retrieve Value (Small)	-2.55853	0.395149	11.2889	5.14584
5 & 6	Broken-axis	2	Retrieve Value (Large)	-0.57195	-0.439016	0.823538	0.498438
5 & 6	Stepped	2	Retrieve Value (Large)	30.4519	-0.439016	42.0935	1.38627
5 & 6	Broken-axis	3	DMD (Two Small Values)	-2.04686	5.10922	32.5589	14.7062
5 & 6	Stepped	3	DMD (Two Small Values)	18.8996	-1.32312	33.8253	15.4198
5 & 6	Broken-axis	4	DMD (Small & Large Values)	-4.81855	-0.662252	25.3277	10.3753
5 & 6	Stepped	4	DMD (Small & Large Values)	47.8964	1.14668	59.9708	8.89134
7 & 8	Radial	1	Retrieve Value (Small)	-1.12434	0	2.1164	0
7 & 8	Circular	1	Retrieve Value (Small)	2.39749	5.55556	4.94378	5.55556
7 & 8	Radial	2	DMD (Small & Large Values)	-7.51539	-0.136799	13.3901	0.683995
7 & 8	Circular	2	DMD (Small & Large Values)	67.0828	2.59918	69.6249	2.59918
7 & 8	Radial	3	DMD (Two Small Values)	64.4672	1.76991	75.7423	7.07965
7 & 8	Circular	3	DMD (Two Small Values)	1.47487	-3.93013	32.3951	12.6638
7 & 8	Radial	4	Sort	-2.43056	0	2.43056	0
7 & 8	Circular	4	Sort	-5.43478	-8.33333	5.43478	8.33333
9 & 10	Traditional Bar	1	Retrieve Value (Small)	-1.71952	-2.77778	4.93299	2.77778
9 & 10	Circular	1	Retrieve Value (Small)	2.39038	1.91083	13.371	4.16667
9 & 10	Traditional Bar	2	DMD (Two Small Values)	-1.20192	-5.30303	27.7753	19.2308
9 & 10	Circular	2	DMD (Two Small Values)	4.70085	-1.51515	31.1966	23.0769
9 & 10	Traditional Bar	3	DMD (Small & Large Values)	67.8667	-2.98507	81.3031	7.71794
9 & 10	Circular	3	DMD (Small & Large Values)	25.034	0.848194	42.0332	12.3835
9 & 10	Traditional Bar	4	Filter	-9.59596	-9.09091	10.3535	9.09091
9 & 10	Circular	4	Filter	-6.72348	0	8.99621	0
1	Traditional Bar	1	Retrieve Value (Small)	13.2187	13.4456	28.2942	13.4456
1	Slanted	1	Retrieve Value (Small)	39.7271	13.4456	67.7663	73.7396
1	Traditional Bar	2	DMD (Two Small Values)	111.272	-12.8502	159.013	27.3752
1	Slanted	2	DMD (Two Small Values)	-2.61674	-12.8502	50.355	45.2496
1	Traditional Bar	3	DMD (Small & Large Values)	1.30719	-8.49673	16.732	15.0327
1	Slanted	3	DMD (Small & Large Values)	16.1022	-1.96078	33.2145	17.6471
1	Traditional Bar	4	Find Extremum	69.6513	-1.01742	73.412	1.99745
1	Slanted	4	Find Extremum	-24.997	-2.85987	28.1503	7.7796
1	Traditional Bar	5	Filter	-1.38889	0	15.2778	16.6667
1	Slanted	5	Filter	-12.5	-8.33333	26.3889	16.6667
2	Traditional Bar	1	Retrieve Value (Small)	78.6354	-2.76044	92.0389	12.9198
2	Slanted	1	Retrieve Value (Small)	79.1191	3.0449	81.2724	5.94758
2	Traditional Bar	2	DMD (Two Small Values)	106.133	23.2105	120.386	34.9448
2	Slanted	2	DMD (Two Small Values)	5.60901	-6.12532	20.8167	9.38747
2	Traditional Bar	3	DMD (Small & Large Values)	-7.63403	-9.18803	31.7599	14.5299
2	Slanted	3	DMD (Small & Large Values)	-0.2849	1.49573	5.50807	3.84615
2	Traditional Bar	4	Find Extremum	-14.2654	-2.88334	14.9079	2.9268
2	Slanted	4	Find Extremum	64.374	-4.21371	92.8673	8.64826
2	Traditional Bar	5	Filter	-5.30303	-4.54545	5.30303	4.54545
2	Slanted	5	Filter	-6.81818	0	8.33333	0
3	Scale-Stack	1	Retrieve Value (Small)	186.193	3.54715	189.802	7.07307
3	Stepped	1	Retrieve Value (Small)	159.974	6.20221	175.607	6.63764
3	Scale-Stack	2	DMD (Two Small Values)	59.4284	9.98005	80.9095	33.5004
3	Stepped	2	DMD (Two Small Values)	-9.54354	2.30702	13.4721	2.30702
3	Scale-Stack	3	DMD (Small & Large Values)	-10.5058	-76.6537	98.4436	84.4358
3	Stepped	3	DMD (Small & Large Values)	-38.3755	-33.8521	38.3755	33.8521
3	Scale-Stack	4	Find Extremum	63.1704	-12.0581	94.3457	12.1171
3	Stepped	4	Find Extremum	-1.611	-0.320772	1.63126	0.320772
4	Scale-Stack	1	Retrieve Value (Small)	101.26	31.406	122.381	78.975
4	Stepped	1	Retrieve Value (Small)	2.55147	11.6951	20.9483	16.4258
4	Scale-Stack	2	DMD (Two Small Values)	62.2349	0.902184	90.2976	27.8253
4	Stepped	2	DMD (Two Small Values)	21.6762	18.7085	25.3799	18.7085
4	Scale-Stack	3	DMD (Small & Large Values)	-30.4487	-24.7863	39.2094	36.3248
4	Stepped	3	DMD (Small & Large Values)	4.1181	6.83761	17.7933	6.83761
4	Scale-Stack	4	Find Extremum	47.8691	-1.52522	79.9751	6.6025
4	Stepped	4	Find Extremum	-1.46046	-1.12328	1.52817	1.12328
5	Broken-axis	1	Retrieve Value (Small)	76.0761	1.25785	90.826	3.75804
5	Stepped	1	Retrieve Value (Small)	-5.09681	0.0077506	17.1914	13.7511
5	Broken-axis	2	Retrieve Value (Large)	-0.0091844	-0.439016	0.503001	0.439016
5	Stepped	2	Retrieve Value (Large)	-7.98106	-0.109145	8.61482	0.599765
5	Broken-axis	3	DMD (Two Small Values)	-3.0852	-1.32312	33.7002	12.7736
5	Stepped	3	DMD (Two Small Values)	-2.60463	-1.32312	12.1351	12.7736
5	Broken-axis	4	DMD (Small & Large Values)	12.1814	-0.662252	18.4427	8.38852
5	Stepped	4	DMD (Small & Large Values)	95.0632	0.441501	109.111	11.6998
6	Broken-axis	1	Retrieve Value (Small)	-9.56743	-0.699549	16.2784	8.89258
6	Stepped	1	Retrieve Value (Small)	-0.0202553	3.74674	5.38643	3.74674
6	Broken-axis	2	Retrieve Value (Large)	-1.13472	-0.812497	1.14407	0.812497
6	Stepped	2	Retrieve Value (Large)	68.8849	-2.91393	75.5721	3.33421
6	Broken-axis	3	DMD (Two Small Values)	-1.00852	6.63057	31.4176	25.6483
6	Stepped	3	DMD (Two Small Values)	38.6118	18.7423	53.7079	33.2478
6	Broken-axis	4	DMD (Small & Large Values)	-23.5185	-19.7531	32.9012	29.321
6	Stepped	4	DMD (Small & Large Values)	0.729517	1.85185	10.8305	4.93827
7	Radial	1	Retrieve Value (Small)	-1.78571	0	2.38095	0
7	Circular	1	Retrieve Value (Small)	3.86905	7.14286	8.03571	7.14286
7	Radial	2	DMD (Small & Large Values)	-2.53078	-0.136799	3.16917	0.136799
7	Circular	2	DMD (Small & Large Values)	0.832193	2.59918	5.91655	2.59918
7	Radial	3	DMD (Two Small Values)	104.13	-0.442478	109.292	6.19469
7	Circular	3	DMD (Two Small Values)	-9.21829	3.09735	36.7994	20.7965
7	Radial	4	Sort	-1.38889	0	1.38889	0
7	Circular	4	Sort	-3.47222	0	3.47222	0
8	Radial	1	Retrieve Value (Small)	-0.462963	0	1.85185	0
8	Circular	1	Retrieve Value (Small)	0.925926	0	1.85185	0
8	Radial	2	DMD (Small & Large Values)	-12.5	0	23.6111	25
8	Circular	2	DMD (Small & Large Values)	133.333	16.6667	133.333	16.6667
8	Radial	3	DMD (Two Small Values)	21.1989	9.17031	39.1425	12.6638
8	Circular	3	DMD (Two Small Values)	13.1401	-8.29694	27.5903	12.6638
8	Radial	4	Sort	-3.47222	0	3.47222	0
8	Circular	4	Sort	-7.57576	-8.33333	7.57576	8.33333
9	Traditional Bar	1	Retrieve Value (Small)	-2.43056	-2.77778	3.125	2.77778
9	Circular	1	Retrieve Value (Small)	10.3009	-0.694444	16.5509	4.16667
9	Traditional Bar	2	DMD (Two Small Values)	3.84615	3.84615	37.1795	23.0769
9	Circular	2	DMD (Two Small Values)	12.1795	-23.0769	42.9487	23.0769
9	Traditional Bar	3	DMD (Small & Large Values)	1.86567	-2.98507	7.83582	2.98507
9	Circular	3	DMD (Small & Large Values)	33.0846	-1.1194	56.592	19.403
9	Traditional Bar	4	Filter	-13.8889	-12.5	13.8889	12.5
9	Circular	4	Filter	-10.4167	0	10.4167	0
10	Traditional Bar	1	Retrieve Value (Small)	-1.00849	1.91083	6.74098	3.18471
10	Circular	1	Retrieve Value (Small)	-5.52017	1.91083	10.1911	3.18471
10	Traditional Bar	2	DMD (Two Small Values)	-6.25	-5.30303	18.3712	7.57576
10	Circular	2	DMD (Two Small Values)	-2.77778	-1.51515	19.4444	6.06061
10	Traditional Bar	3	DMD (Small & Large Values)	133.868	-4.98812	154.77	25.772
10	Circular	3	DMD (Small & Large Values)	16.9834	0.950119	27.4743	5.34442
10	Traditional Bar	4	Filter	-5.30303	-9.09091	6.81818	9.09091
10	Circular	4	Filter	-3.0303	0	7.57576	4.54545

## Sheet: Analysis Results
Section	Question	Adjusted P-Value	Effect Size (r)	Power	Taxonomy						Other Misc. Data:		Unadjusted (raw) p-value
1 & 2	1	0.943148	0.0114619	0.94726	Retrieve Value (Small)								0.943148
1 & 2	2	0.564376	0.142868	0.740466	DMD (Two Small Values)								0.338626
1 & 2	3	0.464676	0.263592	0.789428	DMD (Small & Large Values)								0.0929353
1 & 2	4	0.522742	0.184845	0.752822	Find Extremum								0.209097
1 & 2	5	0.612906	0.101149	0.735398	Filter								0.490325
3 & 4	1	0.263028	0.164967	0.469366	Retrieve Value (Small)								0.263028
3 & 4	2	0.0353247	0.340377	0.304911	DMD (Two Small Values)								0.0176623
3 & 4	3	0.0468343	0.324342	0.286383	DMD (Small & Large Values)								0.0351257
3 & 4	4	2.23394e-08	0.756291	0.809346	Find Extremum (Difference between smallest and largest value)								5.58485e-09
5 & 6	1	1	0.0300105	0.99928	Retrieve Value (Small)								0.840798
5 & 6	2	0.670103	0.200667	0.872505	Retrieve Value (Large)								0.167526
5 & 6	3	1	0.0654673	0.999996	DMD (Two Small Values)								0.660255
5 & 6	4	1	0	0.99999	DMD (Small & Large Values)								1
7 & 8	1	0.0312224	0.354613	0.32168	Retrieve Value (Small)								0.013106
7 & 8	2	0.360566	0.133576	0.538295	DMD (Small & Large Values)								0.360566
7 & 8	3	0.360566	0.157523	0.57024	DMD (Two Small Values)								0.290878
7 & 8	4	0.0312224	0.355051	0.322277	Sort								0.0156112
9 & 10	1	0.731	0.132276	0.856046	Retrieve Value (Small)								0.3655
9 & 10	2	0.873206	0.0240058	0.889019	DMD (Two Small Values)								0.873206
9 & 10	3	0.740475	0.0865849	0.825313	DMD (Small & Large Values)								0.555357
9 & 10	4	0.731	0.164685	0.818155	Filter								0.259915
DATA FOR UNGROUPED SECTIONS:
1	1				Retrieve Value (Small)								0.08293
1	2				DMD (Two Small Values)								0.8335
1	3				DMD (Small & Large Values)								0.8495
1	4				Find Extremum								0.2283
1	5				Filter								0.5087
2	1				Retrieve Value (Small)								0.07518
2	2				DMD (Two Small Values)								0.04338
2	3				DMD (Small & Large Values)								0.04573
2	4				Find Extremum								0.722
2	5				Filter								1
3	1				Retrieve Value (Small)								0.942
3	2				DMD (Two Small Values)								0.003573
3	3				DMD (Small & Large Values)								0.09928
3	4				Find Extremum (Difference between smallest and largest value)								1.183e-05
4	1				Retrieve Value (Small)								0.05193
4	2				DMD (Two Small Values)								0.7106
4	3				DMD (Small & Large Values)								0.3108
4	4				Find Extremum (Difference between smallest and largest value)								0.0001324
5	1				Retrieve Value (Small)								0.5681
5	2				Retrieve Value (Large)								0.6992
5	3				DMD (Two Small Values)								0.3267
5	4				DMD (Small & Large Values)								0.1832
6	1				Retrieve Value (Small)								0.0644
6	2				Retrieve Value (Large)								0.08976
6	3				DMD (Two Small Values)								0.5763
6	4				DMD (Small & Large Values)								0.1081
7	1				Retrieve Value (Small)								0.0006849
7	2				DMD (Small & Large Values)								0.02368
7	3				DMD (Two Small Values)								0.1288
7	4				Sort								0.3707
8	1				Retrieve Value (Small)								1
8	2				DMD (Small & Large Values)								0.6713
8	3				DMD (Two Small Values)								0.6663
8	4				Sort								0.02639
9	1				Retrieve Value (Small)								0.07605
9	2				DMD (Two Small Values)								0.8951
9	3				DMD (Small & Large Values)								0.02425
9	4				Filter								0.353
10	1				Retrieve Value (Small)								0.8676
10	2				DMD (Two Small Values)								0.7593
10	3				DMD (Small & Large Values)								0.2108
10	4				Filter								0.7786

## Sheet: Post-Questionnaire
Participant	Chart	Rating
1	Traditional Bar Chart	4
1	Slanted Perspective Chart	5
1	Scale-Stack Bar Chart	4
1	Stepped Perspective Chart	5
1	Broken-axis Bar Chart	4
1	Radial Bar Chart	5
1	Circular Perspective Chart	4
2	Traditional Bar Chart	4
2	Slanted Perspective Chart	2
2	Scale-Stack Bar Chart	1
2	Stepped Perspective Chart	3
2	Broken-axis Bar Chart	4
2	Radial Bar Chart	5
2	Circular Perspective Chart	4
3	Traditional Bar Chart	4
3	Slanted Perspective Chart	3
3	Scale-Stack Bar Chart	2
3	Stepped Perspective Chart	2
3	Broken-axis Bar Chart	5
3	Radial Bar Chart	2
3	Circular Perspective Chart	4
4	Traditional Bar Chart	5
4	Slanted Perspective Chart	4
4	Scale-Stack Bar Chart	3
4	Stepped Perspective Chart	2
4	Broken-axis Bar Chart	3
4	Radial Bar Chart	2
4	Circular Perspective Chart	4
5	Traditional Bar Chart	3
5	Slanted Perspective Chart	4
5	Scale-Stack Bar Chart	4
5	Stepped Perspective Chart	4
5	Broken-axis Bar Chart	3
5	Radial Bar Chart	4
5	Circular Perspective Chart	3
6	Traditional Bar Chart	4
6	Slanted Perspective Chart	2
6	Scale-Stack Bar Chart	3
6	Stepped Perspective Chart	1
6	Broken-axis Bar Chart	4
6	Radial Bar Chart	2
6	Circular Perspective Chart	4
7	Traditional Bar Chart	5
7	Slanted Perspective Chart	5
7	Scale-Stack Bar Chart	3
7	Stepped Perspective Chart	2
7	Broken-axis Bar Chart	5
7	Radial Bar Chart	5
7	Circular Perspective Chart	2
8	Traditional Bar Chart	5
8	Slanted Perspective Chart	2
8	Scale-Stack Bar Chart	4
8	Stepped Perspective Chart	2
8	Broken-axis Bar Chart	4
8	Radial Bar Chart	4
8	Circular Perspective Chart	2
9	Traditional Bar Chart	2
9	Slanted Perspective Chart	2
9	Scale-Stack Bar Chart	1
9	Stepped Perspective Chart	2
9	Broken-axis Bar Chart	2
9	Radial Bar Chart	3
9	Circular Perspective Chart	4
10	Traditional Bar Chart	4
10	Slanted Perspective Chart	2
10	Scale-Stack Bar Chart	2
10	Stepped Perspective Chart	2
10	Broken-axis Bar Chart	5
10	Radial Bar Chart	1
10	Circular Perspective Chart	1
11	Traditional Bar Chart	3
11	Slanted Perspective Chart	3
11	Scale-Stack Bar Chart	2
11	Stepped Perspective Chart	2
11	Broken-axis Bar Chart	4
11	Radial Bar Chart	3
11	Circular Perspective Chart	1
12	Traditional Bar Chart	3
12	Slanted Perspective Chart	4
12	Scale-Stack Bar Chart	2
12	Stepped Perspective Chart	3
12	Broken-axis Bar Chart	3
12	Radial Bar Chart	5
12	Circular Perspective Chart	5
13	Traditional Bar Chart	5
13	Slanted Perspective Chart	5
13	Scale-Stack Bar Chart	2
13	Stepped Perspective Chart	4
13	Broken-axis Bar Chart	5
13	Radial Bar Chart	3
13	Circular Perspective Chart	3
14	Traditional Bar Chart	5
14	Slanted Perspective Chart	1
14	Scale-Stack Bar Chart	5
14	Stepped Perspective Chart	2
14	Broken-axis Bar Chart	4
14	Radial Bar Chart	2
14	Circular Perspective Chart	2
15	Traditional Bar Chart	3
15	Slanted Perspective Chart	4
15	Scale-Stack Bar Chart	2
15	Stepped Perspective Chart	3
15	Broken-axis Bar Chart	4
15	Radial Bar Chart	2
15	Circular Perspective Chart	3
16	Traditional Bar Chart	5
16	Slanted Perspective Chart	3
16	Scale-Stack Bar Chart	3
16	Stepped Perspective Chart	3
16	Broken-axis Bar Chart	4
16	Radial Bar Chart	1
16	Circular Perspective Chart	1
17	Traditional Bar Chart	4
17	Slanted Perspective Chart	4
17	Scale-Stack Bar Chart	2
17	Stepped Perspective Chart	3
17	Broken-axis Bar Chart	3
17	Radial Bar Chart	2
17	Circular Perspective Chart	1
18	Traditional Bar Chart	5
18	Slanted Perspective Chart	4
18	Scale-Stack Bar Chart	2
18	Stepped Perspective Chart	3
18	Broken-axis Bar Chart	4
18	Radial Bar Chart	2
18	Circular Perspective Chart	1
19	Traditional Bar Chart	3
19	Slanted Perspective Chart	5
19	Scale-Stack Bar Chart	3
19	Stepped Perspective Chart	4
19	Broken-axis Bar Chart	3
19	Radial Bar Chart	4
19	Circular Perspective Chart	1
20	Traditional Bar Chart	2
20	Slanted Perspective Chart	2
20	Scale-Stack Bar Chart	4
20	Stepped Perspective Chart	3
20	Broken-axis Bar Chart	2
20	Radial Bar Chart	2
20	Circular Perspective Chart	4
21	Traditional Bar Chart	3
21	Slanted Perspective Chart	4
21	Scale-Stack Bar Chart	4
21	Stepped Perspective Chart	4
21	Broken-axis Bar Chart	4
21	Radial Bar Chart	3
21	Circular Perspective Chart	1
22	Traditional Bar Chart	3
22	Slanted Perspective Chart	4
22	Scale-Stack Bar Chart	1
22	Stepped Perspective Chart	2
22	Broken-axis Bar Chart	5
22	Radial Bar Chart	2
22	Circular Perspective Chart	1
23	Traditional Bar Chart	5
23	Slanted Perspective Chart	3
23	Scale-Stack Bar Chart	2
23	Stepped Perspective Chart	3
23	Broken-axis Bar Chart	4
23	Radial Bar Chart	4
23	Circular Perspective Chart	2
24	Traditional Bar Chart	3
24	Slanted Perspective Chart	2
24	Scale-Stack Bar Chart	2
24	Stepped Perspective Chart	2
24	Broken-axis Bar Chart	4
24	Radial Bar Chart	3
24	Circular Perspective Chart	4

## Sheet: Time
Section	Individial Section	Chart	Time	Time in Seconds
1	1	Traditional	00:02:37	157
1	1	Traditional	00:03:38	218
1	1	Traditional	00:04:45	285
1	1	Traditional	00:03:36	216
1	1	Traditional	00:06:16	376
1	1	Traditional	00:01:56	116
1	1	Traditional	00:02:51	171
1	1	Traditional	00:05:21	321
1	1	Traditional	00:05:27	327
1	1	Traditional	00:03:58	238
1	1	Traditional	00:04:22	262
1	1	Traditional	00:02:43	163
1	1	Slanted	00:05:32	332
1	1	Slanted	00:07:03	423
1	1	Slanted	00:05:11	311
1	1	Slanted	00:04:07	247
1	1	Slanted	00:02:33	153
1	1	Slanted	00:05:50	350
1	1	Slanted	00:06:24	384
1	1	Slanted	00:02:04	124
1	1	Slanted	00:01:40	100
1	1	Slanted	00:02:14	134
1	1	Slanted	00:02:36	156
1	1	Slanted	00:04:07	247
1	2	Traditional	00:04:14	254
1	2	Traditional	00:04:20	260
1	2	Traditional	00:02:54	174
1	2	Traditional	00:01:32	92
1	2	Traditional	00:02:33	153
1	2	Traditional	00:03:27	207
1	2	Traditional	00:07:12	432
1	2	Traditional	00:02:21	141
1	2	Traditional	00:01:19	79
1	2	Traditional	00:01:45	105
1	2	Traditional	00:02:17	137
1	2	Traditional	00:03:51	231
1	2	Slanted	00:02:20	140
1	2	Slanted	00:02:23	143
1	2	Slanted	00:05:38	338
1	2	Slanted	00:02:22	142
1	2	Slanted	00:06:22	382
1	2	Slanted	00:01:43	103
1	2	Slanted	00:04:02	242
1	2	Slanted	00:05:17	317
1	2	Slanted	00:03:33	213
1	2	Slanted	00:03:40	220
1	2	Slanted	00:03:28	208
1	2	Slanted	00:02:17	137
2	3	Scale-Stack	00:02:55	175
2	3	Scale-Stack	00:04:35	275
2	3	Scale-Stack	00:04:43	283
2	3	Scale-Stack	00:06:13	373
2	3	Scale-Stack	00:09:22	562
2	3	Scale-Stack	00:02:39	159
2	3	Scale-Stack	00:08:37	517
2	3	Scale-Stack	00:07:33	453
2	3	Scale-Stack	00:05:58	358
2	3	Scale-Stack	00:04:32	272
2	3	Scale-Stack	00:05:37	337
2	3	Scale-Stack	00:04:43	283
2	3	Stepped	00:04:15	255
2	3	Stepped	00:04:25	265
2	3	Stepped	00:03:39	219
2	3	Stepped	00:02:09	129
2	3	Stepped	00:04:14	254
2	3	Stepped	00:03:20	200
2	3	Stepped	00:04:37	277
2	3	Stepped	00:02:57	177
2	3	Stepped	00:01:36	96
2	3	Stepped	00:02:11	131
2	3	Stepped	00:02:13	133
2	3	Stepped	00:06:01	361
2	4	Scale-Stack	00:05:28	328
2	4	Scale-Stack	00:06:11	371
2	4	Scale-Stack	00:08:41	521
2	4	Scale-Stack	00:02:54	174
2	4	Scale-Stack	00:06:27	387
2	4	Scale-Stack	00:04:59	299
2	4	Scale-Stack	00:07:49	469
2	4	Scale-Stack	00:03:25	205
2	4	Scale-Stack	00:01:31	91
2	4	Scale-Stack	00:03:34	214
2	4	Scale-Stack	00:04:13	253
2	4	Scale-Stack	00:07:59	479
2	4	Stepped	00:02:16	136
2	4	Stepped	00:02:45	165
2	4	Stepped	00:03:16	196
2	4	Stepped	00:03:05	185
2	4	Stepped	00:03:06	186
2	4	Stepped	00:01:37	97
2	4	Stepped	00:05:51	351
2	4	Stepped	00:03:52	232
2	4	Stepped	00:02:32	152
2	4	Stepped	00:02:32	152
2	4	Stepped	00:03:07	187
2	4	Stepped	00:03:09	189
3	5	Broken	00:01:31	91
3	5	Broken	00:01:41	101
3	5	Broken	00:04:19	259
3	5	Broken	00:05:08	308
3	5	Broken	00:02:07	127
3	5	Broken	00:01:34	94
3	5	Broken	00:03:06	186
3	5	Broken	00:04:03	243
3	5	Broken	00:03:27	207
3	5	Broken	00:04:18	258
3	5	Broken	00:01:54	114
3	5	Broken	00:02:32	152
3	5	Stepped	00:04:09	249
3	5	Stepped	00:03:57	237
3	5	Stepped	00:03:33	213
3	5	Stepped	00:01:46	106
3	5	Stepped	00:02:16	136
3	5	Stepped	00:03:29	209
3	5	Stepped	00:05:55	355
3	5	Stepped	00:01:44	104
3	5	Stepped	00:01:07	67
3	5	Stepped	00:01:16	76
3	5	Stepped	00:01:53	113
3	5	Stepped	00:03:17	197
3	6	Broken	00:03:51	231
3	6	Broken	00:02:37	157
3	6	Broken	00:03:25	205
3	6	Broken	00:01:07	67
3	6	Broken	00:01:40	100
3	6	Broken	00:04:00	240
3	6	Broken	00:02:39	159
3	6	Broken	00:01:40	100
3	6	Broken	00:01:05	65
3	6	Broken	00:01:53	113
3	6	Broken	00:02:23	143
3	6	Broken	00:06:31	391
3	6	Stepped	00:01:37	97
3	6	Stepped	00:01:36	96
3	6	Stepped	00:03:44	224
3	6	Stepped	00:02:51	171
3	6	Stepped	00:02:19	139
3	6	Stepped	00:01:40	100
3	6	Stepped	00:03:53	233
3	6	Stepped	00:04:01	241
3	6	Stepped	00:03:16	196
3	6	Stepped	00:02:09	129
3	6	Stepped	00:01:59	119
3	6	Stepped	00:03:48	228
4	7	Radial	00:03:47	227
4	7	Radial	00:06:16	376
4	7	Radial	00:05:20	320
4	7	Radial	00:06:56	416
4	7	Radial	00:05:13	313
4	7	Radial	00:03:50	230
4	7	Radial	00:04:03	243
4	7	Radial	00:07:59	479
4	7	Radial	00:04:19	259
4	7	Radial	00:04:41	281
4	7	Radial	00:02:56	176
4	7	Radial	00:04:56	296
4	7	Circular	00:04:26	266
4	7	Circular	00:04:28	268
4	7	Circular	00:05:42	342
4	7	Circular	00:04:30	270
4	7	Circular	00:04:05	245
4	7	Circular	00:04:27	267
4	7	Circular	00:06:45	405
4	7	Circular	00:03:03	183
4	7	Circular	00:01:58	118
4	7	Circular	00:02:14	134
4	7	Circular	00:03:47	227
4	7	Circular	00:04:22	262
4	8	Radial	00:04:37	277
4	8	Radial	00:04:29	269
4	8	Radial	00:04:10	250
4	8	Radial	00:06:53	413
4	8	Radial	00:03:37	217
4	8	Radial	00:06:53	413
4	8	Radial	00:08:38	518
4	8	Radial	00:04:18	258
4	8	Radial	00:02:23	143
4	8	Radial	00:02:35	155
4	8	Radial	00:03:27	207
4	8	Radial	00:03:42	222
4	8	Circular	00:05:26	326
4	8	Circular	00:03:07	187
4	8	Circular	00:06:16	376
4	8	Circular	00:05:27	327
4	8	Circular	00:06:36	396
4	8	Circular	00:03:36	216
4	8	Circular	00:04:32	272
4	8	Circular	00:08:07	487
4	8	Circular	00:05:28	328
4	8	Circular	00:02:25	145
4	8	Circular	00:03:32	212
4	8	Circular	00:04:32	272
5	9	Traditional	00:01:13	73
5	9	Traditional	00:01:14	74
5	9	Traditional	00:03:19	199
5	9	Traditional	00:03:14	194
5	9	Traditional	00:03:56	236
5	9	Traditional	00:03:52	232
5	9	Traditional	00:02:59	179
5	9	Traditional	00:04:56	296
5	9	Traditional	00:03:26	206
5	9	Traditional	00:02:04	124
5	9	Traditional	00:01:45	105
5	9	Traditional	00:03:15	195
5	9	Circular	00:04:31	271
5	9	Circular	00:01:46	106
5	9	Circular	00:03:36	216
5	9	Circular	00:02:57	177
5	9	Circular	00:02:29	149
5	9	Circular	00:04:29	269
5	9	Circular	00:04:35	275
5	9	Circular	00:01:51	111
5	9	Circular	00:02:16	136
5	9	Circular	00:01:15	75
5	9	Circular	00:03:33	213
5	9	Circular	00:03:17	197
5	10	Traditional	00:04:00	240
5	10	Traditional	00:01:56	116
5	10	Traditional	00:02:47	167
5	10	Traditional	00:02:30	150
5	10	Traditional	00:03:45	225
5	10	Traditional	00:03:14	194
5	10	Traditional	00:03:06	186
5	10	Traditional	00:01:20	80
5	10	Traditional	00:01:34	94
5	10	Traditional	00:01:12	72
5	10	Traditional	00:03:42	222
5	10	Traditional	00:02:39	159
5	10	Circular	00:03:03	183
5	10	Circular	00:02:29	149
5	10	Circular	00:03:18	198
5	10	Circular	00:03:16	196
5	10	Circular	00:04:16	256
5	10	Circular	00:06:15	375
5	10	Circular	00:04:00	240
5	10	Circular	00:04:30	270
5	10	Circular	00:03:42	222
5	10	Circular	00:02:45	165
5	10	Circular	00:01:51	111
5	10	Circular	00:03:37	217

## Sheet: Time-Analysis
Section	Charts	Comparison Median	Our Median	P-Value	Effect Size
1	Traditional Bar & Slanted	211.5	216.5	0.686494	0.0595287
2	Scale-Stack and Stepped	313.5	186.5	0.000126119	0.532767
3	Broken-axis and Stepped	154.5	155	0.987806	0.00297668
4	Radial and Circular	264	267.5	0.701592	0.0565538
5	Traditional Bar & Circular	182.5	197.5	0.140008	0.214315
